# Supplementary material
Source: PubMed Central journal article supplement (PMC6649137)
Supplement: ao9b01276_si_001.pdf [file ao9b01276_si_001.pdf]

## Supporting Information:

# MS-CASPT2 Studies on the Photophysics of Selenium-Substituted Guanine Nucleobase

Ye-Guang Fang, Qin Peng, Qiu Fang,\* Weihai Fang, and Ganglong Cui\*

*Key Laboratory of Theoretical and Computational Photochemistry, Ministry of Education, College of Chemistry, Beijing Normal University, Beijing 100875, China*

E-mail: [fangqiu917@bnu.edu.cn](mailto:fangqiu917@bnu.edu.cn); [ganglong.cui@bnu.edu.cn](mailto:ganglong.cui@bnu.edu.cn)

## Table of Contents

|                                                  |        |
|--------------------------------------------------|--------|
| 1. MS-CASPT2 Computed Single-Point Energies..... | S2     |
| 2. Spin-Orbit Couplings.....                     | S2     |
| 3. IPEA Calculations.....                        | S2     |
| 4. Cartesian Coordinates.....                    | S3-S39 |

**Table S1. MS-CASPT2 Computed Energies (in eV) of Five Lowest Electronic States i.e.  $S_2(^1\pi\pi^*)$ ,  $S_1(^1n\pi^*)$ ,  $T_2(^3n\pi^*)$ ,  $T_1(^3\pi\pi^*)$ , and  $S_0$  at Different Minima**

|        | $S_0$       | $S_1(^1n\pi^*)$ | $S_2(^1\pi\pi^*)$ | $T_1(^3\pi\pi^*)$ | $T_2(^3n\pi^*)$ |
|--------|-------------|-----------------|-------------------|-------------------|-----------------|
| S0-MIN | <b>0.00</b> | 0.61            | 1.22              | 0.81              | 0.80            |
| S1-MIN | 2.61        | <b>2.46</b>     | 2.65              | 2.52              | 2.48            |
| S2-MIN | 2.39        | 3.30            | <b>3.04</b>       | 3.13              | 3.19            |
| T1-MIN | 2.40        | 2.35            | 2.33              | <b>2.24</b>       | 2.29            |
| T2-MIN | 2.56        | 2.39            | 2.50              | 2.42              | <b>2.36</b>     |
| T3-MIN | 3.55        | 3.99            | 4.36              | 4.12              | 4.17            |

**Table S2. Spin-Orbit Couplings (SOC in  $\text{cm}^{-1}$ ) of 6-Selenoguanine (6SeGua) Computed at MS-CASPT2 Level.**

| Structure | States | SOC ( $\text{cm}^{-1}$ ) |
|-----------|--------|--------------------------|
| S1-MIN    | S1/T1  | 437                      |
| S1-MIN    | S1/T2  | 14                       |
| S2S1T2    | S2/T2  | 435                      |
| S2S1T2    | S1/T2  | 39                       |
| S0T1      | T1/S0  | 252                      |
| T2T1S0    | T1/S0  | 508                      |

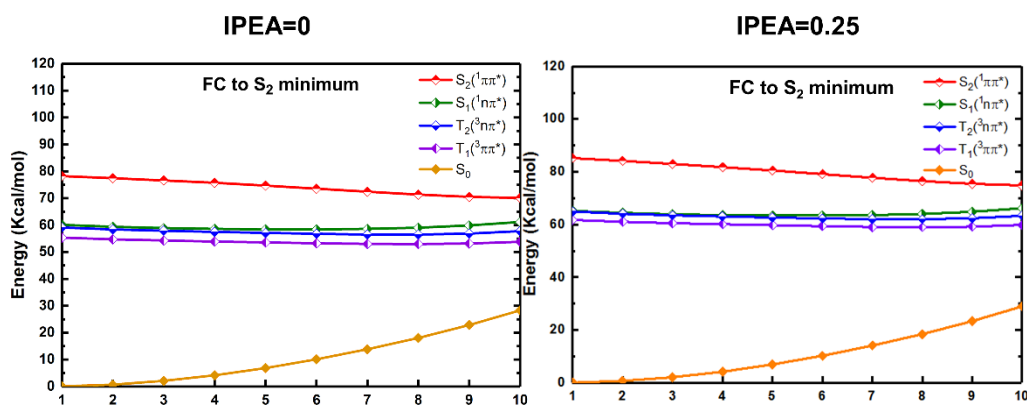

**Figure S1.** MS-CASPT2 calculated linearly interpolated internal coordinate (LIIC) paths connecting Franck-Condon point and  $S_2$  minimum with different IPEA values.

## Cartesian Coordinates

### S0-MIN

|    |             |             |             |
|----|-------------|-------------|-------------|
| C  | 0.44060186  | -0.84507053 | 0.00941773  |
| C  | 1.77902712  | -0.40144277 | -0.00578424 |
| C  | 1.27371405  | 1.75753545  | -0.01700194 |
| C  | -0.59900283 | 0.13376642  | -0.00064814 |
| C  | 1.63827505  | -2.60492038 | 0.01238129  |
| H  | 1.98364711  | -3.63919152 | 0.01811614  |
| N  | -0.06300046 | 1.42833558  | -0.02316954 |
| H  | -0.75515764 | 2.17530907  | -0.10462044 |
| N  | 2.25530236  | 0.87718838  | -0.00416404 |
| N  | 1.56077340  | 3.11273974  | -0.10231715 |
| H  | 0.97137032  | 3.69831195  | 0.48774337  |
| H  | 2.54823975  | 3.27414051  | 0.08961270  |
| N  | 2.53214811  | -1.55082542 | -0.00274545 |
| H  | 3.54558410  | -1.59832262 | -0.01506383 |
| N  | 0.37115754  | -2.22960760 | 0.02031779  |
| Se | -2.40439983 | -0.10656631 | -0.00261418 |

### S1-MIN

|    |             |             |             |
|----|-------------|-------------|-------------|
| C  | 0.43753321  | -0.84279676 | -0.07698105 |
| C  | 1.77077050  | -0.40269378 | -0.00674995 |
| C  | 1.26512865  | 1.76316288  | 0.00282361  |
| C  | -0.58874624 | 0.13908909  | -0.16483743 |
| C  | 1.63925635  | -2.61004017 | -0.01640878 |
| H  | 1.97896042  | -3.64461262 | -0.00002207 |
| N  | -0.09051499 | 1.47268579  | -0.04356049 |
| H  | -0.65625366 | 2.20759920  | -0.46667281 |
| N  | 2.24273422  | 0.89295237  | 0.06491055  |
| N  | 1.54941070  | 3.12865668  | -0.06624313 |
| H  | 0.98029928  | 3.67619256  | 0.57987604  |
| H  | 2.53996677  | 3.27577240  | 0.12555561  |
| N  | 2.52111242  | -1.55545427 | 0.02473679  |
| H  | 3.53370103  | -1.60454615 | 0.07866562  |
| N  | 0.36325500  | -2.22059471 | -0.07764417 |
| Se | -2.40833242 | -0.19399228 | 0.40201170  |

### S2-MIN

|   |             |             |             |
|---|-------------|-------------|-------------|
| C | 0.43734270  | -0.84908936 | -0.17129357 |
| C | 1.78294530  | -0.40341131 | 0.00318393  |
| C | 1.26259215  | 1.75687836  | -0.05118791 |
| C | -0.57423601 | 0.12712670  | -0.38100177 |
| C | 1.63562057  | -2.60832223 | -0.02890278 |
| H | 1.97825154  | -3.64256403 | 0.01248422  |

|    |             |             |             |
|----|-------------|-------------|-------------|
| N  | -0.04180893 | 1.42571955  | -0.26125392 |
| H  | -0.72309525 | 2.17725096  | -0.36930973 |
| N  | 2.24180564  | 0.86276419  | 0.07716941  |
| N  | 1.57512933  | 3.10658118  | -0.03603340 |
| H  | 0.87628762  | 3.69315353  | 0.41742694  |
| H  | 2.50202383  | 3.25563158  | 0.35805373  |
| N  | 2.52371818  | -1.55204957 | 0.08148857  |
| H  | 3.52862060  | -1.60027339 | 0.21662345  |
| N  | 0.37569864  | -2.23056389 | -0.18270497 |
| Se | -2.30261591 | -0.03745328 | 0.67471783  |

T1-MIN

|    |             |             |             |
|----|-------------|-------------|-------------|
| C  | 0.42315945  | -0.84847708 | 0.13686556  |
| C  | 1.76322945  | -0.39805927 | -0.00563927 |
| C  | 1.24815516  | 1.75992091  | 0.00325648  |
| C  | -0.61292810 | 0.13307843  | 0.29989982  |
| C  | 1.63936296  | -2.60628281 | 0.03906793  |
| H  | 1.98698020  | -3.63823931 | 0.01507284  |
| N  | -0.06713274 | 1.44987637  | 0.13139633  |
| H  | -0.73840978 | 2.21047555  | 0.07049527  |
| N  | 2.23881517  | 0.87452381  | -0.05440728 |
| N  | 1.55310297  | 3.10771503  | -0.14461030 |
| H  | 1.02756896  | 3.71981784  | 0.47749219  |
| H  | 2.55567677  | 3.25147161  | -0.03636022 |
| N  | 2.51601483  | -1.54085161 | -0.05348515 |
| H  | 3.52539657  | -1.58033783 | -0.16016352 |
| N  | 0.36663852  | -2.22359366 | 0.15718298  |
| Se | -2.34734917 | -0.18965774 | -0.51660361 |

T2-MIN

|   |             |             |             |
|---|-------------|-------------|-------------|
| C | 0.44064062  | -0.84776160 | -0.11797008 |
| C | 1.76729940  | -0.40313250 | -0.00833153 |
| C | 1.26279429  | 1.75686537  | -0.01427084 |
| C | -0.60006637 | 0.13200205  | -0.25408039 |
| C | 1.64040654  | -2.61375256 | -0.02254937 |
| H | 1.98289018  | -3.64698952 | 0.00583850  |
| N | -0.07249655 | 1.45139079  | -0.14876991 |
| H | -0.67234591 | 2.21054382  | -0.46522658 |
| N | 2.24163431  | 0.88330357  | 0.08050814  |
| N | 1.55573110  | 3.11898027  | -0.05416116 |
| H | 0.94053353  | 3.67581770  | 0.53820302  |
| H | 2.52958784  | 3.26462978  | 0.20849294  |
| N | 2.51845322  | -1.55080278 | 0.04125052  |
| H | 3.52915851  | -1.59438986 | 0.12907770  |

|    |             |             |             |
|----|-------------|-------------|-------------|
| N  | 0.36671992  | -2.22276903 | -0.12025549 |
| Se | -2.35265942 | -0.13255526 | 0.56170452  |

S2T1T2

|    |             |             |             |
|----|-------------|-------------|-------------|
| C  | 0.00000000  | 0.00000000  | 0.00000000  |
| C  | 1.44229000  | 0.00000000  | 0.00000000  |
| C  | 1.65783000  | 0.00000000  | 2.25373000  |
| C  | -0.59927000 | 0.22073000  | 1.22317000  |
| C  | 0.54120000  | -0.12626000 | -2.04952000 |
| H  | 0.52286000  | -0.19687000 | -3.13719000 |
| N  | 0.23882000  | 0.31598000  | 2.28556000  |
| H  | -0.13551000 | 0.40241000  | 3.22303000  |
| N  | 2.27540000  | 0.06164000  | 1.01497000  |
| N  | 2.30796000  | 0.52996000  | 3.40328000  |
| H  | 3.00356000  | -0.14043000 | 3.72958000  |
| H  | 2.82228000  | 1.38331000  | 3.15818000  |
| N  | 1.73796000  | -0.06645000 | -1.35992000 |
| H  | 2.66853000  | -0.16695000 | -1.74930000 |
| N  | -0.52989000 | -0.07618000 | -1.28076000 |
| Se | -2.47290000 | 0.40825000  | 1.46861000  |

T2T1S0

|    |             |             |             |
|----|-------------|-------------|-------------|
| C  | 0.52516396  | -0.90114467 | 0.18157102  |
| C  | 1.85157484  | -0.45142869 | -0.09141164 |
| C  | 1.26514631  | 1.68456982  | -0.16078999 |
| C  | -0.52510938 | 0.03267055  | 0.28523922  |
| C  | 1.75634970  | -2.64840156 | 0.10837270  |
| H  | 2.12683012  | -3.67381114 | 0.12814331  |
| N  | -0.03086527 | 1.30507438  | 0.08472531  |
| H  | -0.75209641 | 2.03608751  | 0.11554632  |
| N  | 2.26914670  | 0.81659619  | -0.25708657 |
| N  | 1.50449023  | 3.02747481  | -0.38957012 |
| H  | 0.94358865  | 3.66512293  | 0.17119714  |
| H  | 2.49781146  | 3.24280971  | -0.33598929 |
| N  | 2.61901338  | -1.58215175 | -0.13346502 |
| H  | 3.61874526  | -1.62288744 | -0.30910646 |
| N  | 0.50333713  | -2.29033365 | 0.30146882  |
| Se | -3.09480912 | 0.84103484  | 0.66067446  |

S0T1

|   |             |             |             |
|---|-------------|-------------|-------------|
| C | 0.37669696  | -0.85003083 | 0.22811035  |
| C | 1.70482149  | -0.39909719 | -0.07468723 |
| C | 1.21729542  | 1.76184033  | 0.10829590  |
| C | -0.67748731 | 0.14240235  | 0.41513149  |

|    |             |             |             |
|----|-------------|-------------|-------------|
| C  | 1.59074295  | -2.60586328 | 0.09052875  |
| H  | 1.94585773  | -3.63668668 | 0.08226068  |
| N  | -0.06155549 | 1.45754608  | 0.41671739  |
| H  | -0.67564311 | 2.22631769  | 0.67530528  |
| N  | 2.17140629  | 0.86309318  | -0.18181761 |
| N  | 1.59672408  | 3.08213880  | 0.18000795  |
| H  | 0.89807619  | 3.77798371  | -0.06117336 |
| H  | 2.51626349  | 3.25237161  | -0.21392824 |
| N  | 2.45029660  | -1.54311377 | -0.15586400 |
| H  | 3.44897642  | -1.58618374 | -0.33791034 |
| N  | 0.34240089  | -2.22934048 | 0.32647233  |
| Se | -1.76658647 | -0.23199658 | -1.13798925 |

### Franck-Condon Point to the S2 Minimum

point1

|    |             |             |             |
|----|-------------|-------------|-------------|
| C  | 0.44060186  | -0.84507053 | 0.00941773  |
| C  | 1.77902712  | -0.40144277 | -0.00578424 |
| C  | 1.27371405  | 1.75753545  | -0.01700194 |
| C  | -0.59900283 | 0.13376642  | -0.00064814 |
| C  | 1.63827505  | -2.60492038 | 0.01238129  |
| H  | 1.98364711  | -3.63919152 | 0.01811614  |
| N  | -0.06300046 | 1.42833558  | -0.02316954 |
| H  | -0.75515764 | 2.17530907  | -0.10462044 |
| N  | 2.25530236  | 0.87718838  | -0.00416404 |
| N  | 1.56077340  | 3.11273974  | -0.10231715 |
| H  | 0.97137032  | 3.69831195  | 0.48774337  |
| H  | 2.54823975  | 3.27414051  | 0.08961270  |
| N  | 2.53214811  | -1.55082542 | -0.00274545 |
| H  | 3.54558410  | -1.59832262 | -0.01506383 |
| N  | 0.37115754  | -2.22960760 | 0.02031779  |
| Se | -2.40439983 | -0.10656631 | -0.00261418 |

point2

|   |             |             |             |
|---|-------------|-------------|-------------|
| C | 0.43949540  | -0.84214690 | -0.00696570 |
| C | 1.78056300  | -0.39987200 | -0.00606940 |
| C | 1.27612390  | 1.75989710  | -0.02130600 |
| C | -0.59783640 | 0.13764370  | -0.03664790 |
| C | 1.63598120  | -2.60335780 | 0.00810570  |
| H | 1.98001980  | -3.63803590 | 0.01711900  |
| N | -0.05906740 | 1.43210560  | -0.04581210 |
| H | -0.74905320 | 2.18073270  | -0.12840810 |
| N | 2.25707480  | 0.87678950  | 0.00158880  |
| N | 1.56852820  | 3.11422490  | -0.09751790 |
| H | 0.96803290  | 3.70074920  | 0.48024870  |

|    |             |             |            |
|----|-------------|-------------|------------|
| H  | 2.55224790  | 3.27337610  | 0.11413560 |
| N  | 2.53132480  | -1.55008130 | 0.00354380 |
| H  | 3.54482900  | -1.59882290 | 0.00431820 |
| N  | 0.36906270  | -2.22626870 | 0.00204320 |
| Se | -2.41904160 | -0.13555230 | 0.07108430 |

point3

|    |             |             |             |
|----|-------------|-------------|-------------|
| C  | 0.43843970  | -0.83995350 | -0.02378670 |
| C  | 1.78182950  | -0.39868260 | -0.00624780 |
| C  | 1.27770660  | 1.76172420  | -0.02574680 |
| C  | -0.59651550 | 0.14050520  | -0.07305780 |
| C  | 1.63407930  | -2.60220820 | 0.00372010  |
| H  | 1.97702690  | -3.63719980 | 0.01605910  |
| N  | -0.05561870 | 1.43498490  | -0.06873460 |
| H  | -0.74369310 | 2.18500130  | -0.15261830 |
| N  | 2.25815020  | 0.87613060  | 0.00752620  |
| N  | 1.57496160  | 3.11520400  | -0.09277230 |
| H  | 0.96341040  | 3.70263360  | 0.47230110  |
| H  | 2.55445890  | 3.27231390  | 0.13871230  |
| N  | 2.53048190  | -1.54951270 | 0.01006230  |
| H  | 3.54389210  | -1.59923710 | 0.02421150  |
| N  | 0.36742370  | -2.22367960 | -0.01670340 |
| Se | -2.42774870 | -0.15664310 | 0.14653530  |

point4

|    |             |             |             |
|----|-------------|-------------|-------------|
| C  | 0.43745350  | -0.83850090 | -0.04109440 |
| C  | 1.78282880  | -0.39788380 | -0.00635600 |
| C  | 1.27846640  | 1.76301420  | -0.03029820 |
| C  | -0.59501210 | 0.14234260  | -0.11004060 |
| C  | 1.63257570  | -2.60148290 | -0.00079270 |
| H  | 1.97467200  | -3.63669600 | 0.01493420  |
| N  | -0.05263430 | 1.43696610  | -0.09203890 |
| H  | -0.73905470 | 2.18811060  | -0.17736950 |
| N  | 2.25852400  | 0.87520760  | 0.01366220  |
| N  | 1.58005670  | 3.11568760  | -0.08797190 |
| H  | 0.95745710  | 3.70393120  | 0.46399940  |
| H  | 2.55482980  | 3.27096670  | 0.16350840  |
| N  | 2.52961660  | -1.54913110 | 0.01679800  |
| H  | 3.54276000  | -1.59957770 | 0.04463370  |
| N  | 0.36625810  | -2.22185040 | -0.03596600 |
| Se | -2.43051260 | -0.16972280 | 0.22385250  |

point5

|   |            |             |             |
|---|------------|-------------|-------------|
| C | 0.43655550 | -0.83782580 | -0.05895530 |
|---|------------|-------------|-------------|

|    |             |             |             |
|----|-------------|-------------|-------------|
| C  | 1.78355620  | -0.39749910 | -0.00642990 |
| C  | 1.27837590  | 1.76374390  | -0.03493240 |
| C  | -0.59329800 | 0.14311130  | -0.14778280 |
| C  | 1.63148960  | -2.60120760 | -0.00545840 |
| H  | 1.97298000  | -3.63654800 | 0.01373400  |
| N  | -0.05011360 | 1.43800940  | -0.11584130 |
| H  | -0.73514150 | 2.19001530  | -0.20280010 |
| N  | 2.25816850  | 0.87400590  | 0.02002080  |
| N  | 1.58374690  | 3.11566690  | -0.08299910 |
| H  | 0.95006730  | 3.70458140  | 0.45544280  |
| H  | 2.55325760  | 3.26933410  | 0.18870830  |
| N  | 2.52872830  | -1.54895490 | 0.02374360  |
| H  | 3.54141840  | -1.59985540 | 0.06561870  |
| N  | 0.36559610  | -2.22081730 | -0.05581020 |
| Se | -2.42710230 | -0.17437920 | 0.30320140  |

point6

|    |             |             |             |
|----|-------------|-------------|-------------|
| C  | 0.43576420  | -0.83799240 | -0.07744320 |
| C  | 1.78399970  | -0.39756730 | -0.00650440 |
| C  | 1.27737490  | 1.76386850  | -0.03961540 |
| C  | -0.59134450 | 0.14272920  | -0.18647780 |
| C  | 1.63085450  | -2.60142430 | -0.01031060 |
| H  | 1.97199870  | -3.63679250 | 0.01243790  |
| N  | -0.04807630 | 1.43804190  | -0.14025780 |
| H  | -0.73198600 | 2.19062820  | -0.22904920 |
| N  | 2.25703240  | 0.87249960  | 0.02663360  |
| N  | 1.58591230  | 3.11511360  | -0.07772430 |
| H  | 0.94107570  | 3.70449630  | 0.44673770  |
| H  | 2.54957630  | 3.26740300  | 0.21451210  |
| N  | 2.52781850  | -1.54901080 | 0.03089160  |
| H  | 3.53985230  | -1.60008000 | 0.08720410  |
| N  | 0.36548100  | -2.22064430 | -0.07631300 |
| Se | -2.41704910 | -0.16988790 | 0.38473890  |

point7

|   |             |             |             |
|---|-------------|-------------|-------------|
| C | 0.43509710  | -0.83909270 | -0.09662650 |
| C | 1.78413880  | -0.39814300 | -0.00661220 |
| C | 1.27536730  | 1.76332130  | -0.04430190 |
| C | -0.58912480 | 0.14107650  | -0.22630410 |
| C | 1.63071720  | -2.60219170 | -0.01538980 |
| H | 1.97179920  | -3.63747930 | 0.01101300  |
| N | -0.04656460 | 1.43695690  | -0.16538790 |
| H | -0.72965270 | 2.18982000  | -0.25623460 |
| N | 2.25503810  | 0.87065140  | 0.03353640  |



|    |             |             |             |
|----|-------------|-------------|-------------|
| N  | 1.58637540  | 3.11397930  | -0.07200330 |
| H  | 0.93025840  | 3.70355880  | 0.43800630  |
| H  | 2.54355510  | 3.26514530  | 0.24112860  |
| N  | 2.52688970  | -1.54933410 | 0.03822830  |
| H  | 3.53804570  | -1.60026090 | 0.10941690  |
| N  | 0.36596870  | -2.22142340 | -0.09755160 |
| Se | -2.39962380 | -0.15520330 | 0.46854260  |

point8

|    |             |             |             |
|----|-------------|-------------|-------------|
| C  | 0.43456710  | -0.84124580 | -0.11655250 |
| C  | 1.78394220  | -0.39929590 | -0.00678250 |
| C  | 1.27221920  | 1.76201310  | -0.04892900 |
| C  | -0.58661730 | 0.13799790  | -0.26739910 |
| C  | 1.63113570  | -2.60358390 | -0.02074070 |
| H  | 1.97247300  | -3.63867060 | 0.00941190  |
| N  | -0.04564730 | 1.43461530  | -0.19129360 |
| H  | -0.72824240 | 2.18742010  | -0.28442470 |
| N  | 2.25208130  | 0.86841190  | 0.04076650  |
| N  | 1.58489940  | 3.11219430  | -0.06567500 |
| H  | 0.91733610  | 3.70162200  | 0.42939520  |
| H  | 2.53489940  | 3.26251620  | 0.26876760  |
| N  | 2.52594450  | -1.54996870 | 0.04572770  |
| H  | 3.53598050  | -1.60040760 | 0.13225630  |
| N  | 0.36712440  | -2.22327380 | -0.11958780 |
| Se | -2.37381110 | -0.12896350 | 0.55452000  |

point9

|    |             |             |             |
|----|-------------|-------------|-------------|
| C  | 0.43417800  | -0.84459330 | -0.13722770 |
| C  | 1.78336640  | -0.40110930 | -0.00703790 |
| C  | 1.26775800  | 1.75983480  | -0.05340890 |
| C  | -0.58381360 | 0.13330850  | -0.30982420 |
| C  | 1.63217500  | -2.60568890 | -0.02640950 |
| H  | 1.97412830  | -3.64043930 | 0.00757160  |
| N  | -0.04542290 | 1.43085050  | -0.21797300 |
| H  | -0.72789620 | 2.18322250  | -0.31360420 |
| N  | 2.24803100  | 0.86572040  | 0.04835760  |
| N  | 1.58118900  | 3.10966870  | -0.05856060 |
| H  | 0.90198250  | 3.69851080  | 0.42108560  |
| H  | 2.52325920  | 3.25945260  | 0.29762780  |
| N  | 2.52498330  | -1.55096580 | 0.05334430  |
| H  | 3.53363690  | -1.60053050 | 0.15567410  |
| N  | 0.36901630  | -2.22633680 | -0.14244890 |
| Se | -2.33828630 | -0.08952390 | 0.64229400  |

point10

|    |             |             |             |
|----|-------------|-------------|-------------|
| C  | 0.43734270  | -0.84908936 | -0.17129357 |
| C  | 1.78294530  | -0.40341131 | 0.00318393  |
| C  | 1.26259215  | 1.75687836  | -0.05118791 |
| C  | -0.57423601 | 0.12712670  | -0.38100177 |
| C  | 1.63562057  | -2.60832223 | -0.02890278 |
| H  | 1.97825154  | -3.64256403 | 0.01248422  |
| N  | -0.04180893 | 1.42571955  | -0.26125392 |
| H  | -0.72309525 | 2.17725096  | -0.36930973 |
| N  | 2.24180564  | 0.86276419  | 0.07716941  |
| N  | 1.57512933  | 3.10658118  | -0.03603340 |
| H  | 0.87628762  | 3.69315353  | 0.41742694  |
| H  | 2.50202383  | 3.25563158  | 0.35805373  |
| N  | 2.52371818  | -1.55204957 | 0.08148857  |
| H  | 3.52862060  | -1.60027339 | 0.21662345  |
| N  | 0.37569864  | -2.23056389 | -0.18270497 |
| Se | -2.30261591 | -0.03745328 | 0.67471783  |

#### The S2 Minimum to the S1 Minimum

point1

|    |             |             |             |
|----|-------------|-------------|-------------|
| C  | 0.43734270  | -0.84908936 | -0.17129357 |
| C  | 1.78294530  | -0.40341131 | 0.00318393  |
| C  | 1.26259215  | 1.75687836  | -0.05118791 |
| C  | -0.57423601 | 0.12712670  | -0.38100177 |
| C  | 1.63562057  | -2.60832223 | -0.02890278 |
| H  | 1.97825154  | -3.64256403 | 0.01248422  |
| N  | -0.04180893 | 1.42571955  | -0.26125392 |
| H  | -0.72309525 | 2.17725096  | -0.36930973 |
| N  | 2.24180564  | 0.86276419  | 0.07716941  |
| N  | 1.57512933  | 3.10658118  | -0.03603340 |
| H  | 0.87628762  | 3.69315353  | 0.41742694  |
| H  | 2.50202383  | 3.25563158  | 0.35805373  |
| N  | 2.52371818  | -1.55204957 | 0.08148857  |
| H  | 3.52862060  | -1.60027339 | 0.21662345  |
| N  | 0.37569864  | -2.23056389 | -0.18270497 |
| Se | -2.30261591 | -0.03745328 | 0.67471783  |

point2

|   |             |             |             |
|---|-------------|-------------|-------------|
| C | 0.43766610  | -0.84925100 | -0.16136210 |
| C | 1.78199280  | -0.40382010 | 0.00294370  |
| C | 1.26288830  | 1.75754640  | -0.04549950 |
| C | -0.57545830 | 0.12793080  | -0.35917150 |
| C | 1.63695470  | -2.60903630 | -0.02632900 |
| H | 1.97958520  | -3.64321640 | 0.01284840  |

|    |             |             |             |
|----|-------------|-------------|-------------|
| N  | -0.04809220 | 1.43092120  | -0.23950130 |
| H  | -0.71407380 | 2.19014110  | -0.38276430 |
| N  | 2.24189850  | 0.86587020  | 0.07706700  |
| N  | 1.57336880  | 3.10902010  | -0.03965360 |
| H  | 0.88528350  | 3.69125700  | 0.43569320  |
| H  | 2.50884890  | 3.25797130  | 0.33407860  |
| N  | 2.52419270  | -1.55268850 | 0.07730970  |
| H  | 3.53012020  | -1.60068940 | 0.20477970  |
| N  | 0.37499780  | -2.23035090 | -0.17167270 |
| Se | -2.32188840 | -0.06022560 | 0.64069380  |

point3

|    |             |             |             |
|----|-------------|-------------|-------------|
| C  | 0.43795860  | -0.84920570 | -0.15149090 |
| C  | 1.78095050  | -0.40410420 | 0.00273970  |
| C  | 1.26318230  | 1.75823150  | -0.03969010 |
| C  | -0.57670100 | 0.12885720  | -0.33735750 |
| C  | 1.63809390  | -2.60961580 | -0.02381860 |
| H  | 1.98064610  | -3.64375550 | 0.01313510  |
| N  | -0.05413130 | 1.43611190  | -0.21754360 |
| H  | -0.70525590 | 2.20059730  | -0.39616460 |
| N  | 2.24197180  | 0.86904600  | 0.07704770  |
| N  | 1.57128600  | 3.11149020  | -0.04307070 |
| H  | 0.89463610  | 3.68935170  | 0.45389900  |
| H  | 2.51490860  | 3.26035910  | 0.31010120  |
| N  | 2.52448600  | -1.55325100 | 0.07312510  |
| H  | 3.53137450  | -1.60109860 | 0.19293970  |
| N  | 0.37418410  | -2.22992350 | -0.16069040 |
| Se | -2.33930550 | -0.08171050 | 0.60629900  |

point4

|   |             |             |             |
|---|-------------|-------------|-------------|
| C | 0.43822470  | -0.84895760 | -0.14168700 |
| C | 1.77982280  | -0.40426230 | 0.00257060  |
| C | 1.26346640  | 1.75892940  | -0.03375780 |
| C | -0.57796590 | 0.12989490  | -0.31556930 |
| C | 1.63904790  | -2.61006140 | -0.02137310 |
| H | 1.98144720  | -3.64418110 | 0.01334440  |
| N | -0.05993390 | 1.44128850  | -0.19539280 |
| H | -0.69667280 | 2.20865570  | -0.40951650 |
| N | 2.24202380  | 0.87229480  | 0.07711230  |
| N | 1.56889550  | 3.11398140  | -0.04628050 |
| H | 0.90436150  | 3.68744170  | 0.47202220  |
| H | 2.52021390  | 3.26277270  | 0.28613650  |
| N | 2.52460550  | -1.55373420 | 0.06893500  |
| H | 3.53239130  | -1.60149490 | 0.18110670  |

|    |             |             |             |
|----|-------------|-------------|-------------|
| N  | 0.37326610  | -2.22928610 | -0.14976320 |
| Se | -2.35490920 | -0.10190160 | 0.57157290  |

point5

|    |             |             |             |
|----|-------------|-------------|-------------|
| C  | 0.43846810  | -0.84850820 | -0.13195650 |
| C  | 1.77861300  | -0.40429150 | 0.00243630  |
| C  | 1.26373240  | 1.75963640  | -0.02769800 |
| C  | -0.57925550 | 0.13103510  | -0.29381490 |
| C  | 1.63982480  | -2.61037150 | -0.01899510 |
| H  | 1.98199890  | -3.64449050 | 0.01347420  |
| N  | -0.06550850 | 1.44644910  | -0.17305630 |
| H  | -0.68834800 | 2.21433670  | -0.42282940 |
| N  | 2.24205180  | 0.87562040  | 0.07726380  |
| N  | 1.56621180  | 3.11648350  | -0.04927960 |
| H  | 0.91447510  | 3.68553220  | 0.49003950  |
| H  | 2.52477620  | 3.26518960  | 0.26219770  |
| N  | 2.52455680  | -1.55413370 | 0.06473940  |
| H  | 3.53317660  | -1.60187160 | 0.16928360  |
| N  | 0.37225140  | -2.22844030 | -0.13889730 |
| Se | -2.36874020 | -0.12079570 | 0.53655260  |

point6

|    |             |             |             |
|----|-------------|-------------|-------------|
| C  | 0.43869130  | -0.84785740 | -0.12230530 |
| C  | 1.77732380  | -0.40418790 | 0.00233800  |
| C  | 1.26397220  | 1.76034990  | -0.02150340 |
| C  | -0.58057300 | 0.13227170  | -0.27210080 |
| C  | 1.64043090  | -2.61054320 | -0.01668800 |
| H  | 1.98231010  | -3.64468020 | 0.01352070  |
| N  | -0.07086380 | 1.45159290  | -0.15053760 |
| H  | -0.68029830 | 2.21764300  | -0.43611370 |
| N  | 2.24205310  | 0.87902760  | 0.07750740  |
| N  | 1.56324990  | 3.11898780  | -0.05206510 |
| H  | 0.92499260  | 3.68363040  | 0.50792660  |
| H  | 2.52860810  | 3.26758840  | 0.23829600  |
| N  | 2.52434470  | -1.55444450 | 0.06053870  |
| H  | 3.53373540  | -1.60222120 | 0.15747390  |
| N  | 0.37114590  | -2.22738590 | -0.12809990 |
| Se | -2.38083800 | -0.13839130 | 0.50127280  |

point7

|   |             |             |             |
|---|-------------|-------------|-------------|
| C | 0.43889630  | -0.84700320 | -0.11273920 |
| C | 1.77595780  | -0.40394630 | 0.00227730  |
| C | 1.26417840  | 1.76106870  | -0.01516440 |
| C | -0.58192200 | 0.13360030  | -0.25043270 |

|    |             |             |             |
|----|-------------|-------------|-------------|
| C  | 1.64087120  | -2.61057240 | -0.01445660 |
| H  | 1.98238720  | -3.64474520 | 0.01347810  |
| N  | -0.07600860 | 1.45672080  | -0.12783700 |
| H  | -0.67253500 | 2.21855910  | -0.44937890 |
| N  | 2.24202480  | 0.88252210  | 0.07785010  |
| N  | 1.56002510  | 3.12148660  | -0.05463530 |
| H  | 0.93592880  | 3.68174570  | 0.52565800  |
| H  | 2.53172260  | 3.26994850  | 0.21444080  |
| N  | 2.52397270  | -1.55466050 | 0.05633320  |
| H  | 3.53407180  | -1.60253630 | 0.14568130  |
| N  | 0.36995450  | -2.22612060 | -0.11737920 |
| Se | -2.39124090 | -0.15468750 | 0.46576490  |

point8

|    |             |             |             |
|----|-------------|-------------|-------------|
| C  | 0.43908460  | -0.84594140 | -0.10326370 |
| C  | 1.77451690  | -0.40356010 | 0.00225680  |
| C  | 1.26434400  | 1.76179300  | -0.00866970 |
| C  | -0.58330660 | 0.13501940  | -0.22881590 |
| C  | 1.64114930  | -2.61045340 | -0.01230630 |
| H  | 1.98223510  | -3.64467940 | 0.01333900  |
| N  | -0.08095130 | 1.46183490  | -0.10495160 |
| H  | -0.66506380 | 2.21704980  | -0.46263010 |
| N  | 2.24196460  | 0.88611090  | 0.07830070  |
| N  | 1.55655270  | 3.12397330  | -0.05698960 |
| H  | 0.94729830  | 3.67988950  | 0.54320640  |
| H  | 2.53413320  | 3.27225010  | 0.19063940  |
| N  | 2.52344390  | -1.55477460 | 0.05212340  |
| H  | 3.53418880  | -1.60280870 | 0.13390970  |
| N  | 0.36868040  | -2.22464020 | -0.10674460 |
| Se | -2.39998550 | -0.16968310 | 0.43005630  |

point9

|   |             |             |             |
|---|-------------|-------------|-------------|
| C | 0.43925690  | -0.84466610 | -0.09388500 |
| C | 1.77300310  | -0.40302150 | 0.00227990  |
| C | 1.26446290  | 1.76252400  | -0.00200640 |
| C | -0.58473140 | 0.13652940  | -0.20725550 |
| C | 1.64126710  | -2.61017950 | -0.01024350 |
| H | 1.98185650  | -3.64447570 | 0.01309490  |
| N | -0.08570010 | 1.46693890  | -0.08187660 |
| H | -0.65788550 | 2.21305990  | -0.47586630 |
| N | 2.24187020  | 0.88980160  | 0.07886970  |
| N | 1.55284850  | 3.12644280  | -0.05912880 |
| H | 0.95911450  | 3.67807520  | 0.56054310  |

|    |             |             |             |
|----|-------------|-------------|-------------|
| H  | 2.53585390  | 3.27447430  | 0.16689730  |
| N  | 2.52276000  | -1.55477910 | 0.04791020  |
| H  | 3.53408900  | -1.60302990 | 0.12216400  |
| N  | 0.36732580  | -2.22293870 | -0.09620680 |
| Se | -2.40710640 | -0.18337550 | 0.39417000  |

point10

|    |             |             |             |
|----|-------------|-------------|-------------|
| C  | 0.43753321  | -0.84279676 | -0.07698105 |
| C  | 1.77077050  | -0.40269378 | -0.00674995 |
| C  | 1.26512865  | 1.76316288  | 0.00282361  |
| C  | -0.58874624 | 0.13908909  | -0.16483743 |
| C  | 1.63925635  | -2.61004017 | -0.01640878 |
| H  | 1.97896042  | -3.64461262 | -0.00002207 |
| N  | -0.09051499 | 1.47268579  | -0.04356049 |
| H  | -0.65625366 | 2.20759920  | -0.46667281 |
| N  | 2.24273422  | 0.89295237  | 0.06491055  |
| N  | 1.54941070  | 3.12865668  | -0.06624313 |
| H  | 0.98029928  | 3.67619256  | 0.57987604  |
| H  | 2.53996677  | 3.27577240  | 0.12555561  |
| N  | 2.52111242  | -1.55545427 | 0.02473679  |
| H  | 3.53370103  | -1.60454615 | 0.07866562  |
| N  | 0.36325500  | -2.22059471 | -0.07764417 |
| Se | -2.40833242 | -0.19399228 | 0.40201170  |

**The S2 Minimum to S2S1T2 crossing point**

point1

|    |             |             |             |
|----|-------------|-------------|-------------|
| C  | 0.43734270  | -0.84908936 | -0.17129357 |
| C  | 1.78294530  | -0.40341131 | 0.00318393  |
| C  | 1.26259215  | 1.75687836  | -0.05118791 |
| C  | -0.57423601 | 0.12712670  | -0.38100177 |
| C  | 1.63562057  | -2.60832223 | -0.02890278 |
| H  | 1.97825154  | -3.64256403 | 0.01248422  |
| N  | -0.04180893 | 1.42571955  | -0.26125392 |
| H  | -0.72309525 | 2.17725096  | -0.36930973 |
| N  | 2.24180564  | 0.86276419  | 0.07716941  |
| N  | 1.57512933  | 3.10658118  | -0.03603340 |
| H  | 0.87628762  | 3.69315353  | 0.41742694  |
| H  | 2.50202383  | 3.25563158  | 0.35805373  |
| N  | 2.52371818  | -1.55204957 | 0.08148857  |
| H  | 3.52862060  | -1.60027339 | 0.21662345  |
| N  | 0.37569864  | -2.23056389 | -0.18270497 |
| Se | -2.30261591 | -0.03745328 | 0.67471783  |

point2

|    |             |             |             |
|----|-------------|-------------|-------------|
| C  | 0.43655510  | -0.85215450 | -0.14922740 |
| C  | 1.78381250  | -0.40143360 | 0.01146190  |
| C  | 1.25812510  | 1.76593120  | -0.01741130 |
| C  | -0.56790580 | 0.12512040  | -0.35269120 |
| C  | 1.63697270  | -2.60991340 | -0.02303790 |
| H  | 1.98125510  | -3.64378990 | 0.01285760  |
| N  | -0.05180980 | 1.42438000  | -0.24304700 |
| H  | -0.73182720 | 2.17757490  | -0.33947580 |
| N  | 2.24080820  | 0.86208090  | 0.08156460  |
| N  | 1.55391530  | 3.12350600  | -0.04485420 |
| H  | 0.93203430  | 3.68991620  | 0.53021440  |
| H  | 2.52906490  | 3.28312370  | 0.20424120  |
| N  | 2.52545870  | -1.55339950 | 0.07881210  |
| H  | 3.53063010  | -1.60213790 | 0.21059570  |
| N  | 0.37546620  | -2.23422380 | -0.16361870 |
| Se | -2.35427060 | -0.07320050 | 0.56307620  |

point3

|    |             |             |             |
|----|-------------|-------------|-------------|
| C  | 0.43533710  | -0.85452510 | -0.12675040 |
| C  | 1.78390610  | -0.39834040 | 0.02079800  |
| C  | 1.25183010  | 1.77463380  | 0.01949960  |
| C  | -0.56337370 | 0.12281250  | -0.32326230 |
| C  | 1.63837270  | -2.61041500 | -0.01829300 |
| H  | 1.98464510  | -3.64380860 | 0.01113920  |
| N  | -0.06310160 | 1.42233760  | -0.22245470 |
| H  | -0.74230750 | 2.17666530  | -0.30673960 |
| N  | 2.23826370  | 0.86255380  | 0.08812310  |
| N  | 1.53166410  | 3.13845240  | -0.04899100 |
| H  | 1.01140230  | 3.68861010  | 0.63299230  |
| H  | 2.53333110  | 3.30414850  | 0.04817500  |
| N  | 2.52672850  | -1.55338770 | 0.07609630  |
| H  | 3.53216660  | -1.60243880 | 0.20453250  |
| N  | 0.37528660  | -2.23718610 | -0.14541500 |
| Se | -2.39586620 | -0.10873220 | 0.45001020  |

point4

|   |             |             |             |
|---|-------------|-------------|-------------|
| C | 0.43381640  | -0.85612990 | -0.10396050 |
| C | 1.78339170  | -0.39421540 | 0.03132420  |
| C | 1.24419570  | 1.78294500  | 0.05997420  |
| C | -0.56032890 | 0.12045410  | -0.29267380 |
| C | 1.63972270  | -2.60986850 | -0.01497310 |
| H | 1.98819500  | -3.64268840 | 0.00686340  |
| N | -0.07521110 | 1.41981190  | -0.19931340 |
| H | -0.75392220 | 2.17483020  | -0.27110390 |

|    |             |             |             |
|----|-------------|-------------|-------------|
| N  | 2.23451300  | 0.86404050  | 0.09734570  |
| N  | 1.50908850  | 3.15148840  | -0.04833910 |
| H  | 1.11180110  | 3.68866720  | 0.72122930  |
| H  | 2.51450530  | 3.31824720  | -0.10624520 |
| N  | 2.52755300  | -1.55216020 | 0.07333400  |
| H  | 3.53323460  | -1.60145840 | 0.19854350  |
| N  | 0.37511560  | -2.23935360 | -0.12844770 |
| Se | -2.42738570 | -0.14323030 | 0.33590270  |

point5

|    |             |             |             |
|----|-------------|-------------|-------------|
| C  | 0.43210940  | -0.85688470 | -0.08093850 |
| C  | 1.78242940  | -0.38911790 | 0.04316540  |
| C  | 1.23568700  | 1.79082370  | 0.10435610  |
| C  | -0.55848070 | 0.11827740  | -0.26088830 |
| C  | 1.64092590  | -2.60827880 | -0.01332130 |
| H  | 1.99168490  | -3.64045130 | -0.00034370 |
| N  | -0.08768260 | 1.41701350  | -0.17353590 |
| H  | -0.76608200 | 2.17236620  | -0.23269620 |
| N  | 2.22989390  | 0.86642260  | 0.10968710  |
| N  | 1.48694610  | 3.16261030  | -0.04303640 |
| H  | 1.22986540  | 3.68918120  | 0.79090190  |
| H  | 2.47305470  | 3.32504330  | -0.25522240 |
| N  | 2.52795910  | -1.54982220 | 0.07054110  |
| H  | 3.53384230  | -1.59943110 | 0.19275740  |
| N  | 0.37490290  | -2.24060820 | -0.11300910 |
| Se | -2.44877110 | -0.17576390 | 0.22104300  |

point6

|    |             |             |             |
|----|-------------|-------------|-------------|
| C  | 0.43031540  | -0.85668960 | -0.05774790 |
| C  | 1.78116320  | -0.38307120 | 0.05643330  |
| C  | 1.22671550  | 1.79823810  | 0.15288650  |
| C  | -0.55757530 | 0.11649050  | -0.22787980 |
| C  | 1.64189610  | -2.60560260 | -0.01350920 |
| H  | 1.99492000  | -3.63705820 | -0.01074860 |
| N  | -0.10010360 | 1.41413890  | -0.14512140 |
| H  | -0.77825270 | 2.16955490  | -0.19177830 |
| N  | 2.22472070  | 0.86961580  | 0.12553640  |
| N  | 1.46601310  | 3.17173670  | -0.03346960 |
| H  | 1.36160800  | 3.68891740  | 0.83867200  |
| H  | 2.41020890  | 3.32420500  | -0.39521520 |
| N  | 2.52797560  | -1.54642200 | 0.06775630  |
| H  | 3.53400240  | -1.59651960 | 0.18731770  |
| N  | 0.37459860  | -2.24080840 | -0.09932100 |
| Se | -2.45992100 | -0.20534580 | 0.10564900  |



## point7

|    |             |             |             |
|----|-------------|-------------|-------------|
| C  | 0.42850850  | -0.85542480 | -0.03443410 |
| C  | 1.77970930  | -0.37605020 | 0.07121810  |
| C  | 1.21760750  | 1.80517610  | 0.20569140  |
| C  | -0.55741410 | 0.11527520  | -0.19363860 |
| C  | 1.64256670  | -2.60173560 | -0.01563120 |
| H  | 1.99774910  | -3.63239290 | -0.02450040 |
| N  | -0.11212960 | 1.41136720  | -0.11416100 |
| H  | -0.78998560 | 2.16665970  | -0.14874690 |
| N  | 2.21926160  | 0.87358290  | 0.14519560  |
| N  | 1.44706000  | 3.17870140  | -0.02027100 |
| H  | 1.50260130  | 3.68628810  | 0.86203560  |
| H  | 2.32791480  | 3.31542970  | -0.52307170 |
| N  | 2.52763140  | -1.54193270 | 0.06503590  |
| H  | 3.53373100  | -1.59278860 | 0.18237220  |
| N  | 0.37415900  | -2.23978530 | -0.08752540 |
| Se | -2.46068610 | -0.23099010 | -0.01010840 |

## point8

|    |             |             |             |
|----|-------------|-------------|-------------|
| C  | 0.42672990  | -0.85294760 | -0.01102210 |
| C  | 1.77814310  | -0.36796880 | 0.08757920  |
| C  | 1.20857220  | 1.81165600  | 0.26277170  |
| C  | -0.55787200 | 0.11478300  | -0.15817300 |
| C  | 1.64289870  | -2.59650080 | -0.01970000 |
| H  | 2.00008200  | -3.62624880 | -0.04162270 |
| N  | -0.12350880 | 1.40885700  | -0.08083880 |
| H  | -0.80094570 | 2.16392230  | -0.10412780 |
| N  | 2.21371280  | 0.87834730  | 0.16885460  |
| N  | 1.43083140  | 3.18324320  | -0.00430740 |
| H  | 1.64817900  | 3.67930130  | 0.85944450  |
| H  | 2.22877050  | 3.29845980  | -0.63614940 |
| N  | 2.52695350  | -1.53623500 | 0.06244540  |
| H  | 3.53304630  | -1.58817880 | 0.17805470  |
| N  | 0.37355330  | -2.23734120 | -0.07767380 |
| Se | -2.45086160 | -0.25176920 | -0.12607500 |

## point9

|   |             |             |             |
|---|-------------|-------------|-------------|
| C | 0.42497990  | -0.84909020 | 0.01248690  |
| C | 1.77648640  | -0.35866640 | 0.10553340  |
| C | 1.19967240  | 1.81773770  | 0.32399330  |
| C | -0.55891580 | 0.11513190  | -0.12150690 |
| C | 1.64288950  | -2.58964030 | -0.02564460 |
| H | 2.00190760  | -3.61831850 | -0.06200840 |

|    |             |             |             |
|----|-------------|-------------|-------------|
| N  | -0.13410650 | 1.40674260  | -0.04542730 |
| H  | -0.81093720 | 2.16155780  | -0.05856140 |
| N  | 2.20817270  | 0.88400950  | 0.19656170  |
| N  | 1.41802830  | 3.18498980  | 0.01334010  |
| H  | 1.79364770  | 3.66549560  | 0.83040310  |
| H  | 2.11593650  | 3.27313040  | -0.73242150 |
| N  | 2.52596400  | -1.52909990 | 0.06004550  |
| H  | 3.53196710  | -1.58247960 | 0.17445920  |
| N  | 0.37276930  | -2.23325110 | -0.06971570 |
| Se | -2.43017710 | -0.26686930 | -0.24207720 |

point10

|    |             |             |             |
|----|-------------|-------------|-------------|
| C  | 0.00000000  | 0.00000000  | 0.00000000  |
| C  | 1.44229000  | 0.00000000  | 0.00000000  |
| C  | 1.65783000  | 0.00000000  | 2.25373000  |
| C  | -0.59927000 | 0.22073000  | 1.22317000  |
| C  | 0.54120000  | -0.12626000 | -2.04952000 |
| H  | 0.52286000  | -0.19687000 | -3.13719000 |
| N  | 0.23882000  | 0.31598000  | 2.28556000  |
| H  | -0.13551000 | 0.40241000  | 3.22303000  |
| N  | 2.27540000  | 0.06164000  | 1.01497000  |
| N  | 2.30796000  | 0.52996000  | 3.40328000  |
| H  | 3.00356000  | -0.14043000 | 3.72958000  |
| H  | 2.82228000  | 1.38331000  | 3.15818000  |
| N  | 1.73796000  | -0.06645000 | -1.35992000 |
| H  | 2.66853000  | -0.16695000 | -1.74930000 |
| N  | -0.52989000 | -0.07618000 | -1.28076000 |
| Se | -2.47290000 | 0.40825000  | 1.46861000  |

**The S1 minimum to the T2 minimum**

point1

|   |             |             |             |
|---|-------------|-------------|-------------|
| C | 0.43753321  | -0.84279676 | -0.07698105 |
| C | 1.77077050  | -0.40269378 | -0.00674995 |
| C | 1.26512865  | 1.76316288  | 0.00282361  |
| C | -0.58874624 | 0.13908909  | -0.16483743 |
| C | 1.63925635  | -2.61004017 | -0.01640878 |
| H | 1.97896042  | -3.64461262 | -0.00002207 |
| N | -0.09051499 | 1.47268579  | -0.04356049 |
| H | -0.65625366 | 2.20759920  | -0.46667281 |
| N | 2.24273422  | 0.89295237  | 0.06491055  |
| N | 1.54941070  | 3.12865668  | -0.06624313 |
| H | 0.98029928  | 3.67619256  | 0.57987604  |
| H | 2.53996677  | 3.27577240  | 0.12555561  |
| N | 2.52111242  | -1.55545427 | 0.02473679  |

|    |             |             |             |
|----|-------------|-------------|-------------|
| H  | 3.53370103  | -1.60454615 | 0.07866562  |
| N  | 0.36325500  | -2.22059471 | -0.07764417 |
| Se | -2.40833242 | -0.19399228 | 0.40201170  |

point2

|    |             |             |             |
|----|-------------|-------------|-------------|
| C  | 0.43780800  | -0.84345460 | -0.08152330 |
| C  | 1.77039900  | -0.40279800 | -0.00711820 |
| C  | 1.26508650  | 1.76265020  | 0.00091550  |
| C  | -0.59000760 | 0.13835710  | -0.17446540 |
| C  | 1.63942430  | -2.61051880 | -0.01737670 |
| H  | 1.97948840  | -3.64493570 | 0.00022700  |
| N  | -0.08858000 | 1.47039400  | -0.05517860 |
| H  | -0.65839890 | 2.20872950  | -0.46628730 |
| N  | 2.24276190  | 0.89186670  | 0.06644300  |
| N  | 1.55052750  | 3.12774360  | -0.06479900 |
| H  | 0.97615570  | 3.67625760  | 0.57566330  |
| H  | 2.53951160  | 3.27461900  | 0.13483760  |
| N  | 2.52087760  | -1.55498470 | 0.02619420  |
| H  | 3.53332550  | -1.60344960 | 0.08371610  |
| N  | 0.36360240  | -2.22094160 | -0.08243270 |
| Se | -2.40369580 | -0.18815360 | 0.42064470  |

point3

|    |             |             |             |
|----|-------------|-------------|-------------|
| C  | 0.43809000  | -0.84408140 | -0.08606220 |
| C  | 1.77001930  | -0.40289090 | -0.00748180 |
| C  | 1.26499350  | 1.76209070  | -0.00097040 |
| C  | -0.59127910 | 0.13762330  | -0.18409520 |
| C  | 1.63956970  | -2.61098200 | -0.01835050 |
| H  | 1.97997850  | -3.64524650 | 0.00046600  |
| N  | -0.08663160 | 1.46809260  | -0.06674330 |
| H  | -0.66046250 | 2.20967180  | -0.46584880 |
| N  | 2.24275530  | 0.89077830  | 0.06798550  |
| N  | 1.55154850  | 3.12678850  | -0.06334600 |
| H  | 0.97197980  | 3.67628680  | 0.57141600  |
| H  | 2.53890070  | 3.27343250  | 0.14409850  |
| N  | 2.52062110  | -1.55450880 | 0.02764870  |
| H  | 3.53291460  | -1.60235540 | 0.08876170  |
| N  | 0.36394420  | -2.22125730 | -0.08722190 |
| Se | -2.39865600 | -0.18206070 | 0.43920380  |

point4

|   |            |             |             |
|---|------------|-------------|-------------|
| C | 0.43837930 | -0.84467720 | -0.09059750 |
| C | 1.76963210 | -0.40297240 | -0.00783990 |
| C | 1.26485040 | 1.76148480  | -0.00283370 |

|    |             |             |             |
|----|-------------|-------------|-------------|
| C  | -0.59256120 | 0.13688740  | -0.19372690 |
| C  | 1.63969250  | -2.61143060 | -0.01933050 |
| H  | 1.98043070  | -3.64554630 | 0.00069420  |
| N  | -0.08466930 | 1.46578120  | -0.07825400 |
| H  | -0.66244700 | 2.21042790  | -0.46535620 |
| N  | 2.24271560  | 0.88968740  | 0.06953880  |
| N  | 1.55247440  | 3.12579240  | -0.06188440 |
| H  | 0.96777160  | 3.67628080  | 0.56713470  |
| H  | 2.53813520  | 3.27221470  | 0.15333770  |
| N  | 2.52034350  | -1.55402730 | 0.02910080  |
| H  | 3.53246920  | -1.60126440 | 0.09380350  |
| N  | 0.36428000  | -2.22154180 | -0.09201250 |
| Se | -2.39321100 | -0.17571540 | 0.45768600  |

point5

|    |             |             |             |
|----|-------------|-------------|-------------|
| C  | 0.43867600  | -0.84524150 | -0.09512910 |
| C  | 1.76923760  | -0.40304230 | -0.00819200 |
| C  | 1.26465760  | 1.76083230  | -0.00467450 |
| C  | -0.59385450 | 0.13614950  | -0.20336040 |
| C  | 1.63979220  | -2.61186430 | -0.02031700 |
| H  | 1.98084410  | -3.64583500 | 0.00091100  |
| N  | -0.08269280 | 1.46345920  | -0.08971050 |
| H  | -0.66435480 | 2.21099940  | -0.46480790 |
| N  | 2.24264360  | 0.88859420  | 0.07110390  |
| N  | 1.55330510  | 3.12475550  | -0.06041440 |
| H  | 0.96353110  | 3.67623920  | 0.56281960  |
| H  | 2.53721540  | 3.27096630  | 0.16255480  |
| N  | 2.52004480  | -1.55354010 | 0.03055120  |
| H  | 3.53198910  | -1.60017720 | 0.09884240  |
| N  | 0.36460950  | -2.22179500 | -0.09680520 |
| Se | -2.38735810 | -0.16911920 | 0.47608800  |

point6

|   |             |             |             |
|---|-------------|-------------|-------------|
| C | 0.43898010  | -0.84577400 | -0.09965660 |
| C | 1.76883600  | -0.40310060 | -0.00853740 |
| C | 1.26441550  | 1.76013300  | -0.00649230 |
| C | -0.59515940 | 0.13540950  | -0.21299550 |
| C | 1.63986840  | -2.61228300 | -0.02131040 |
| H | 1.98121820  | -3.64611250 | 0.00111560  |
| N | -0.08070160 | 1.46112620  | -0.10111240 |
| H | -0.66618790 | 2.21138740  | -0.46420240 |
| N | 2.24253990  | 0.88749870  | 0.07268160  |
| N | 1.55404060  | 3.12367790  | -0.05893650 |
| H | 0.95925790  | 3.67616180  | 0.55847110  |

|    |             |             |             |
|----|-------------|-------------|-------------|
| H  | 2.53614180  | 3.26968830  | 0.17174940  |
| N  | 2.51972470  | -1.55304740 | 0.03200050  |
| H  | 3.53147410  | -1.59909430 | 0.10387940  |
| N  | 0.36493230  | -2.22201610 | -0.10160060 |
| Se | -2.38109450 | -0.16227370 | 0.49440660  |

point7

|    |             |             |             |
|----|-------------|-------------|-------------|
| C  | 0.43929150  | -0.84627420 | -0.10417970 |
| C  | 1.76842750  | -0.40314690 | -0.00887550 |
| C  | 1.26412430  | 1.75938660  | -0.00828710 |
| C  | -0.59647650 | 0.13466740  | -0.22263220 |
| C  | 1.63992060  | -2.61268650 | -0.02231080 |
| H  | 1.98155220  | -3.64637880 | 0.00130720  |
| N  | -0.07869540 | 1.45878130  | -0.11245920 |
| H  | -0.66794840 | 2.21159290  | -0.46353820 |
| N  | 2.24240510  | 0.88640100  | 0.07427290  |
| N  | 1.55468100  | 3.12255970  | -0.05745080 |
| H  | 0.95495180  | 3.67604820  | 0.55408910  |
| H  | 2.53491460  | 3.26838130  | 0.18092070  |
| N  | 2.51938290  | -1.55254940 | 0.03344940  |
| H  | 3.53092400  | -1.59801610 | 0.10891550  |
| N  | 0.36524790  | -2.22220500 | -0.10639940 |
| Se | -2.37441710 | -0.15518050 | 0.51263830  |

point8

|    |             |             |             |
|----|-------------|-------------|-------------|
| C  | 0.43961030  | -0.84674170 | -0.10869820 |
| C  | 1.76801220  | -0.40318100 | -0.00920550 |
| C  | 1.26378450  | 1.75859290  | -0.01005860 |
| C  | -0.59780630 | 0.13392320  | -0.23227040 |
| C  | 1.63994830  | -2.61307470 | -0.02331880 |
| H  | 1.98184530  | -3.64663380 | 0.00148520  |
| N  | -0.07667380 | 1.45642410  | -0.12375040 |
| H  | -0.66963820 | 2.21161710  | -0.46281340 |
| N  | 2.24223970  | 0.88530120  | 0.07587860  |
| N  | 1.55522620  | 3.12140110  | -0.05595780 |
| H  | 0.95061250  | 3.67589800  | 0.54967400  |
| H  | 2.53353430  | 3.26704610  | 0.19006840  |
| N  | 2.51901940  | -1.55204600 | 0.03489840  |
| H  | 3.53033850  | -1.59694320 | 0.11395170  |
| N  | 0.36555580  | -2.22236090 | -0.11120220 |
| Se | -2.36732270 | -0.14784120 | 0.53077920  |

point9

|   |            |             |             |
|---|------------|-------------|-------------|
| C | 0.43993640 | -0.84717600 | -0.11321160 |
|---|------------|-------------|-------------|

|    |             |             |             |
|----|-------------|-------------|-------------|
| C  | 1.76759020  | -0.40320280 | -0.00952680 |
| C  | 1.26339620  | 1.75775160  | -0.01180640 |
| C  | -0.59914920 | 0.13317690  | -0.24190990 |
| C  | 1.63995080  | -2.61344740 | -0.02433460 |
| H  | 1.98209680  | -3.64687740 | 0.00164880  |
| N  | -0.07463630 | 1.45405400  | -0.13498560 |
| H  | -0.67125920 | 2.21146050  | -0.46202630 |
| N  | 2.24204440  | 0.88419950  | 0.07749970  |
| N  | 1.55567620  | 3.12020200  | -0.05445790 |
| H  | 0.94623980  | 3.67571080  | 0.54522570  |
| H  | 2.53200110  | 3.26568350  | 0.19919160  |
| N  | 2.51863390  | -1.55153740 | 0.03634820  |
| H  | 3.52971740  | -1.59587600 | 0.11898910  |
| N  | 0.36585570  | -2.22248340 | -0.11600980 |
| Se | -2.35980810 | -0.14025740 | 0.54882580  |

point10

|    |             |             |             |
|----|-------------|-------------|-------------|
| C  | 0.44064062  | -0.84776160 | -0.11797008 |
| C  | 1.76729940  | -0.40313250 | -0.00833153 |
| C  | 1.26279429  | 1.75686537  | -0.01427084 |
| C  | -0.60006637 | 0.13200205  | -0.25408039 |
| C  | 1.64040654  | -2.61375256 | -0.02254937 |
| H  | 1.98289018  | -3.64698952 | 0.00583850  |
| N  | -0.07249655 | 1.45139079  | -0.14876991 |
| H  | -0.67234591 | 2.21054382  | -0.46522658 |
| N  | 2.24163431  | 0.88330357  | 0.08050814  |
| N  | 1.55573110  | 3.11898027  | -0.05416116 |
| H  | 0.94053353  | 3.67581770  | 0.53820302  |
| H  | 2.52958784  | 3.26462978  | 0.20849294  |
| N  | 2.51845322  | -1.55080278 | 0.04125052  |
| H  | 3.52915851  | -1.59438986 | 0.12907770  |
| N  | 0.36671992  | -2.22276903 | -0.12025549 |
| Se | -2.35265942 | -0.13255526 | 0.56170452  |

### The S1 minimum to the T1 minimum

point1

|   |             |             |             |
|---|-------------|-------------|-------------|
| C | 0.43753321  | -0.84279676 | -0.07698105 |
| C | 1.77077050  | -0.40269378 | -0.00674995 |
| C | 1.26512865  | 1.76316288  | 0.00282361  |
| C | -0.58874624 | 0.13908909  | -0.16483743 |
| C | 1.63925635  | -2.61004017 | -0.01640878 |
| H | 1.97896042  | -3.64461262 | -0.00002207 |
| N | -0.09051499 | 1.47268579  | -0.04356049 |
| H | -0.65625366 | 2.20759920  | -0.46667281 |

|    |             |             |             |
|----|-------------|-------------|-------------|
| N  | 2.24273422  | 0.89295237  | 0.06491055  |
| N  | 1.54941070  | 3.12865668  | -0.06624313 |
| H  | 0.98029928  | 3.67619256  | 0.57987604  |
| H  | 2.53996677  | 3.27577240  | 0.12555561  |
| N  | 2.52111242  | -1.55545427 | 0.02473679  |
| H  | 3.53370103  | -1.60454615 | 0.07866562  |
| N  | 0.36325500  | -2.22059471 | -0.07764417 |
| Se | -2.40833242 | -0.19399228 | 0.40201170  |

point2

|    |             |             |             |
|----|-------------|-------------|-------------|
| C  | 0.43695080  | -0.84768760 | -0.05405660 |
| C  | 1.77233490  | -0.40446910 | -0.00666260 |
| C  | 1.26654590  | 1.76601350  | 0.00234350  |
| C  | -0.58599920 | 0.14003890  | -0.11582840 |
| C  | 1.64317680  | -2.61224740 | -0.00999300 |
| H  | 1.98518450  | -3.64613520 | 0.00237280  |
| N  | -0.08562060 | 1.47409640  | -0.02478970 |
| H  | -0.67373440 | 2.21244290  | -0.40921080 |
| N  | 2.24509680  | 0.89086210  | 0.05168990  |
| N  | 1.55458600  | 3.12946810  | -0.07434070 |
| H  | 0.99054710  | 3.68441850  | 0.56961480  |
| H  | 2.54682620  | 3.27549120  | 0.10878700  |
| N  | 2.52440840  | -1.55545150 | 0.01675410  |
| H  | 3.53792830  | -1.60245130 | 0.05348580  |
| N  | 0.36577630  | -2.22520460 | -0.05238970 |
| Se | -2.44572160 | -0.19780350 | 0.30168390  |

point3

|    |             |             |             |
|----|-------------|-------------|-------------|
| C  | 0.43612850  | -0.85161110 | -0.03134890 |
| C  | 1.77328860  | -0.40570500 | -0.00644580 |
| C  | 1.26708280  | 1.76810860  | 0.00197630  |
| C  | -0.58459770 | 0.14052300  | -0.06715290 |
| C  | 1.64618370  | -2.61382970 | -0.00360900 |
| H  | 1.99018360  | -3.64711490 | 0.00473140  |
| N  | -0.08139560 | 1.47456510  | -0.00637460 |
| H  | -0.68917740 | 2.21602660  | -0.35159510 |
| N  | 2.24667900  | 0.88878700  | 0.03879610  |
| N  | 1.55867610  | 3.12951460  | -0.08234250 |
| H  | 0.99946650  | 3.69179660  | 0.55917660  |
| H  | 2.55246470  | 3.27452150  | 0.09236780  |
| N  | 2.52677930  | -1.55504020 | 0.00900920  |
| H  | 3.54091890  | -1.60016370 | 0.02880290  |
| N  | 0.36778570  | -2.22883170 | -0.02737390 |
| Se | -2.47218060 | -0.20016560 | 0.20084240  |

## point4

|    |             |             |             |
|----|-------------|-------------|-------------|
| C  | 0.43506990  | -0.85455590 | -0.00875020 |
| C  | 1.77366490  | -0.40640160 | -0.00611530 |
| C  | 1.26679010  | 1.76945780  | 0.00173740  |
| C  | -0.58452740 | 0.14058820  | -0.01854940 |
| C  | 1.64829170  | -2.61479120 | 0.00274780  |
| H  | 1.99396770  | -3.64756000 | 0.00703480  |
| N  | -0.07779900 | 1.47412140  | 0.01181000  |
| H  | -0.70257750 | 2.21844710  | -0.29380830 |
| N  | 2.24754430  | 0.88672700  | 0.02616620  |
| N  | 1.56170900  | 3.12881320  | -0.09030540 |
| H  | 1.00712940  | 3.69835890  | 0.54853510  |
| H  | 2.55692960  | 3.27290270  | 0.07615210  |
| N  | 2.52825600  | -1.55422960 | 0.00141600  |
| H  | 3.54271880  | -1.59770030 | 0.00443150  |
| N  | 0.36929090  | -2.23146970 | -0.00248640 |
| Se | -2.48817230 | -0.20132690 | 0.09944420  |

## point5

|    |             |             |             |
|----|-------------|-------------|-------------|
| C  | 0.43376800  | -0.85649510 | 0.01387430  |
| C  | 1.77347920  | -0.40655180 | -0.00568360 |
| C  | 1.26570260  | 1.77005330  | 0.00165100  |
| C  | -0.58579460 | 0.14026790  | 0.03029200  |
| C  | 1.64949100  | -2.61512600 | 0.00908720  |
| H  | 1.99651580  | -3.64746960 | 0.00926270  |
| N  | -0.07479460 | 1.47276660  | 0.02992050  |
| H  | -0.71392800 | 2.21977540  | -0.23578210 |
| N  | 2.24774020  | 0.88468030  | 0.01373100  |
| N  | 1.56367800  | 3.12736530  | -0.09828900 |
| H  | 1.01357740  | 3.70411820  | 0.53766570  |
| H  | 2.56023160  | 3.27066810  | 0.05997190  |
| N  | 2.52884330  | -1.55302400 | -0.00612040 |
| H  | 3.54333980  | -1.59507710 | -0.01984000 |
| N  | 0.37028440  | -2.23309640 | 0.02240950  |
| Se | -2.49384790 | -0.20147380 | -0.00269040 |

## point6

|   |             |             |             |
|---|-------------|-------------|-------------|
| C | 0.43220400  | -0.85738210 | 0.03668090  |
| C | 1.77272850  | -0.40613880 | -0.00516160 |
| C | 1.26383780  | 1.76986810  | 0.00174820  |
| C | -0.58842960 | 0.13958190  | 0.07972260  |
| C | 1.64974300  | -2.61481750 | 0.01542110  |
| H | 1.99776920  | -3.64683430 | 0.01139120  |



|    |             |             |             |
|----|-------------|-------------|-------------|
| N  | -0.07235060 | 1.47047140  | 0.04813810  |
| H  | -0.72321120 | 2.22005710  | -0.17740940 |
| N  | 2.24729810  | 0.88264380  | 0.00141570  |
| N  | 1.56453730  | 3.12515590  | -0.10635730 |
| H  | 1.01881310  | 3.70906610  | 0.52654210  |
| H  | 2.56233940  | 3.26784740  | 0.04363900  |
| N  | 2.52851650  | -1.55142290 | -0.01370440 |
| H  | 3.54275590  | -1.59231160 | -0.04424650 |
| N  | 0.37074100  | -2.23367000 | 0.04747010  |
| Se | -2.48900640 | -0.20073330 | -0.10582960 |

point7

|    |             |             |             |
|----|-------------|-------------|-------------|
| C  | 0.43034760  | -0.85714530 | 0.05984130  |
| C  | 1.77139030  | -0.40513530 | -0.00455980 |
| C  | 1.26119620  | 1.76885310  | 0.00206650  |
| C  | -0.59248990 | 0.13853670  | 0.13013100  |
| C  | 1.64897360  | -2.61383610 | 0.02175950  |
| H  | 1.99762230  | -3.64563500 | 0.01338940  |
| N  | -0.07043790 | 1.46717130  | 0.06666360  |
| H  | -0.73039050 | 2.21931050  | -0.11855630 |
| N  | 2.24623310  | 0.88061270  | -0.01085930 |
| N  | 1.56419530  | 3.12215250  | -0.11458090 |
| H  | 1.02278870  | 3.71317060  | 0.51513270  |
| H  | 2.56317120  | 3.26446940  | 0.02694410  |
| N  | 2.52721680  | -1.54942150 | -0.02145070 |
| H  | 3.54089660  | -1.58942600 | -0.06904550 |
| N  | 0.37061410  | -2.23312390 | 0.07286410  |
| Se | -2.47304140 | -0.19917250 | -0.21027950 |

point8

|   |             |             |             |
|---|-------------|-------------|-------------|
| C | 0.42815590  | -0.85568300 | 0.08353620  |
| C | 1.76942160  | -0.40350080 | -0.00389070 |
| C | 1.25776050  | 1.76693320  | 0.00264760  |
| C | -0.59806440 | 0.13712460  | 0.18193680  |
| C | 1.64706520  | -2.61213810 | 0.02810690  |
| H | 1.99591010  | -3.64384250 | 0.01521560  |
| N | -0.06902770 | 1.46276020  | 0.08571130  |
| H | -0.73540250 | 2.21752340  | -0.05907500 |
| N | 2.24454490  | 0.87858020  | -0.02317940 |
| N | 1.56250500  | 3.11830280  | -0.12303860 |
| H | 1.02539080  | 3.71637130  | 0.50339590  |
| H | 2.56258350  | 3.26056670  | 0.00965560  |
| N | 2.52484540  | -1.54701150 | -0.02948550 |
| H | 3.53764070  | -1.58645100 | -0.09451530 |

|    |             |             |             |
|----|-------------|-------------|-------------|
| N  | 0.36982960  | -2.23136090 | 0.09876440  |
| Se | -2.44487270 | -0.19679360 | -0.31632570 |

point9

|    |             |             |             |
|----|-------------|-------------|-------------|
| C  | 0.42557190  | -0.85285540 | 0.10794580  |
| C  | 1.76675870  | -0.40117950 | -0.00317160 |
| C  | 1.25349720  | 1.76400210  | 0.00353550  |
| C  | -0.60527710 | 0.13532230  | 0.23558200  |
| C  | 1.64384570  | -2.60966300 | 0.03445540  |
| H  | 1.99239260  | -3.64141600 | 0.01681150  |
| N  | -0.06808710 | 1.45708150  | 0.10550230  |
| H  | -0.73814840 | 2.21464750  | 0.00117870  |
| N  | 2.24221870  | 0.87653690  | -0.03563510 |
| N  | 1.55925110  | 3.11353350  | -0.13182130 |
| H  | 1.02641920  | 3.71857330  | 0.49127560  |
| H  | 2.56035530  | 3.25618340  | -0.00848150 |
| N  | 2.52125680  | -1.54418290 | -0.03794800 |
| H  | 3.53280740  | -1.58343320 | -0.12095280 |
| N  | 0.36827840  | -2.22824600 | 0.12533650  |
| Se | -2.40285410 | -0.19352330 | -0.42415290 |

point10

|    |             |             |             |
|----|-------------|-------------|-------------|
| C  | 0.42315945  | -0.84847708 | 0.13686556  |
| C  | 1.76322945  | -0.39805927 | -0.00563927 |
| C  | 1.24815516  | 1.75992091  | 0.00325648  |
| C  | -0.61292810 | 0.13307843  | 0.29989982  |
| C  | 1.63936296  | -2.60628281 | 0.03906793  |
| H  | 1.98698020  | -3.63823931 | 0.01507284  |
| N  | -0.06713274 | 1.44987637  | 0.13139633  |
| H  | -0.73840978 | 2.21047555  | 0.07049527  |
| N  | 2.23881517  | 0.87452381  | -0.05440728 |
| N  | 1.55310297  | 3.10771503  | -0.14461030 |
| H  | 1.02756896  | 3.71981784  | 0.47749219  |
| H  | 2.55567677  | 3.25147161  | -0.03636022 |
| N  | 2.51601483  | -1.54085161 | -0.05348515 |
| H  | 3.52539657  | -1.58033783 | -0.16016352 |
| N  | 0.36663852  | -2.22359366 | 0.15718298  |
| Se | -2.34734917 | -0.18965774 | -0.51660361 |

**The T2 minimum to the T1 minimum**

point1

|   |            |             |             |
|---|------------|-------------|-------------|
| C | 0.44064062 | -0.84776160 | -0.11797008 |
| C | 1.76729940 | -0.40313250 | -0.00833153 |
| C | 1.26279429 | 1.75686537  | -0.01427084 |

|    |             |             |             |
|----|-------------|-------------|-------------|
| C  | -0.60006637 | 0.13200205  | -0.25408039 |
| C  | 1.64040654  | -2.61375256 | -0.02254937 |
| H  | 1.98289018  | -3.64698952 | 0.00583850  |
| N  | -0.07249655 | 1.45139079  | -0.14876991 |
| H  | -0.67234591 | 2.21054382  | -0.46522658 |
| N  | 2.24163431  | 0.88330357  | 0.08050814  |
| N  | 1.55573110  | 3.11898027  | -0.05416116 |
| H  | 0.94053353  | 3.67581770  | 0.53820302  |
| H  | 2.52958784  | 3.26462978  | 0.20849294  |
| N  | 2.51845322  | -1.55080278 | 0.04125052  |
| H  | 3.52915851  | -1.59438986 | 0.12907770  |
| N  | 0.36671992  | -2.22276903 | -0.12025549 |
| Se | -2.35265942 | -0.13255526 | 0.56170452  |

point2

|    |             |             |             |
|----|-------------|-------------|-------------|
| C  | 0.43994630  | -0.85251760 | -0.09109370 |
| C  | 1.77011230  | -0.40510310 | -0.00838350 |
| C  | 1.26540870  | 1.76122710  | -0.01328500 |
| C  | -0.59474460 | 0.13528450  | -0.19664980 |
| C  | 1.64528190  | -2.61577500 | -0.01510090 |
| H  | 1.99007220  | -3.64840440 | 0.00836440  |
| N  | -0.07014980 | 1.45685740  | -0.11899250 |
| H  | -0.68538760 | 2.21492680  | -0.40734490 |
| N  | 2.24524990  | 0.88240160  | 0.06495130  |
| N  | 1.56185500  | 3.12175090  | -0.06365600 |
| H  | 0.95674850  | 3.68484890  | 0.53302210  |
| H  | 2.54005090  | 3.26638910  | 0.18270410  |
| N  | 2.52328090  | -1.55140210 | 0.03160730  |
| H  | 3.53568300  | -1.59327010 | 0.09869620  |
| N  | 0.36937260  | -2.22759710 | -0.09050210 |
| Se | -2.41449430 | -0.14823570 | 0.44512300  |

point3

|   |             |             |             |
|---|-------------|-------------|-------------|
| C | 0.43895930  | -0.85623240 | -0.06441430 |
| C | 1.77209030  | -0.40648750 | -0.00810710 |
| C | 1.26686140  | 1.76458480  | -0.01200860 |
| C | -0.59114620 | 0.13765480  | -0.13951590 |
| C | 1.64899600  | -2.61712400 | -0.00774410 |
| H | 1.99572240  | -3.64924250 | 0.01071440  |
| N | -0.06833420 | 1.46088440  | -0.08952700 |
| H | -0.69704990 | 2.21806870  | -0.34965030 |
| N | 2.24775340  | 0.88147020  | 0.05010230  |
| N | 1.56637940  | 3.12351310  | -0.07286600 |
| H | 0.97103760  | 3.69275500  | 0.52764720  |

|    |             |             |             |
|----|-------------|-------------|-------------|
| H  | 2.54852180  | 3.26727670  | 0.15754960  |
| N  | 2.52688030  | -1.55157230 | 0.02239270  |
| H  | 3.54052020  | -1.59198890 | 0.06913390  |
| N  | 0.37139640  | -2.23135250 | -0.06111690 |
| Se | -2.46030230 | -0.16082630 | 0.32687010  |

point4

|    |             |             |             |
|----|-------------|-------------|-------------|
| C  | 0.43769700  | -0.85890200 | -0.03785340 |
| C  | 1.77329640  | -0.40728590 | -0.00754630 |
| C  | 1.26723510  | 1.76696850  | -0.01045660 |
| C  | -0.58923270 | 0.13918100  | -0.08243620 |
| C  | 1.65158920  | -2.61780860 | -0.00048350 |
| H  | 1.99987800  | -3.64951570 | 0.01287040  |
| N  | -0.06700710 | 1.46353650  | -0.06029360 |
| H  | -0.70731520 | 2.22007580  | -0.29216070 |
| N  | 2.24925250  | 0.88051820  | 0.03586380  |
| N  | 1.56939530  | 3.12429950  | -0.08188770 |
| H  | 0.98353170  | 3.69960210  | 0.52201730  |
| H  | 2.55513020  | 3.26733500  | 0.13285070  |
| N  | 2.52931750  | -1.55132340 | 0.01349590  |
| H  | 3.54376570  | -1.59055970 | 0.04017790  |
| N  | 0.37281570  | -2.23403870 | -0.03200340 |
| Se | -2.49106330 | -0.17070160 | 0.20730560  |

point5

|    |             |             |             |
|----|-------------|-------------|-------------|
| C  | 0.43615440  | -0.86049920 | -0.01126580 |
| C  | 1.77376390  | -0.40748830 | -0.00673650 |
| C  | 1.26659020  | 1.76839220  | -0.00862340 |
| C  | -0.58899290 | 0.13991810  | -0.02505480 |
| C  | 1.65306440  | -2.61782420 | 0.00669240  |
| H  | 2.00253070  | -3.64922350 | 0.01481640  |
| N  | -0.06613610 | 1.46484850  | -0.03113770 |
| H  | -0.71617880 | 2.22102500  | -0.23480140 |
| N  | 2.24982880  | 0.87955260  | 0.02212570  |
| N  | 1.57095030  | 3.12412600  | -0.09082040 |
| H  | 0.99433830  | 3.70543870  | 0.51608220  |
| H  | 2.55996310  | 3.26659870  | 0.10838440  |
| N  | 2.53061920  | -1.55065830 | 0.00478630  |
| H  | 3.54546580  | -1.58899430 | 0.01155470  |
| N  | 0.37362820  | -2.23563600 | -0.00299780 |
| Se | -2.50730340 | -0.17819500 | 0.08645600  |

point6

|   |            |             |            |
|---|------------|-------------|------------|
| C | 0.43430380 | -0.86096590 | 0.01554920 |
|---|------------|-------------|------------|

|    |             |             |             |
|----|-------------|-------------|-------------|
| C  | 1.77349250  | -0.40707100 | -0.00570740 |
| C  | 1.26496060  | 1.76884950  | -0.00648540 |
| C  | -0.59044890 | 0.13990660  | 0.03308270  |
| C  | 1.65337600  | -2.61714910 | 0.01380400  |
| H  | 2.00361110  | -3.64835190 | 0.01653260  |
| N  | -0.06569900 | 1.46482020  | -0.00184390 |
| H  | -0.72363710 | 2.22096260  | -0.17742690 |
| N  | 2.24953390  | 0.87857880  | 0.00876710  |
| N  | 1.57104040  | 3.12298930  | -0.09976810 |
| H  | 1.00352750  | 3.71029230  | 0.50979490  |
| H  | 2.56305190  | 3.26509380  | 0.08388700  |
| N  | 2.53076250  | -1.54957250 | -0.00388750 |
| H  | 3.54560430  | -1.58730690 | -0.01706560 |
| N  | 0.37380020  | -2.23609350 | 0.02611790  |
| Se | -2.50899380 | -0.18360100 | -0.03589050 |

point7

|    |             |             |             |
|----|-------------|-------------|-------------|
| C  | 0.43209260  | -0.86020290 | 0.04283760  |
| C  | 1.77244320  | -0.40599210 | -0.00448650 |
| C  | 1.26235060  | 1.76830990  | -0.00400380 |
| C  | -0.59366360 | 0.13917290  | 0.09251970  |
| C  | 1.65241710  | -2.61574020 | 0.02087360  |
| H  | 2.00296930  | -3.64687090 | 0.01798770  |
| N  | -0.06568310 | 1.46341000  | 0.02785250  |
| H  | -0.72967920 | 2.21990210  | -0.11984220 |
| N  | 2.24838480  | 0.87760120  | -0.00434280 |
| N  | 1.56960060  | 3.12086340  | -0.10884170 |
| H  | 1.01111720  | 3.71416560  | 0.50310440  |
| H  | 2.56435950  | 3.26283760  | 0.05905710  |
| N  | 2.52966350  | -1.54805410 | -0.01270070 |
| H  | 3.54408800  | -1.58551790 | -0.04606870 |
| N  | 0.37325830  | -2.23531900 | 0.05560310  |
| Se | -2.49543260 | -0.18718440 | -0.16008930 |

point8

|   |             |             |             |
|---|-------------|-------------|-------------|
| C | 0.42943900  | -0.85805650 | 0.07087910  |
| C | 1.77053180  | -0.40418600 | -0.00310440 |
| C | 1.25873130  | 1.76671450  | -0.00112690 |
| C | -0.59874870 | 0.13772960  | 0.15387910  |
| C | 1.65000010  | -2.61352820 | 0.02791540  |
| H | 2.00034920  | -3.64473050 | 0.01912960  |
| N | -0.06608450 | 1.46052790  | 0.05825340  |
| H | -0.73427970 | 2.21782020  | -0.06182750 |
| N | 2.24635960  | 0.87662400  | -0.01734540 |

|    |             |             |             |
|----|-------------|-------------|-------------|
| N  | 1.56649250  | 3.11769690  | -0.11816110 |
| H  | 1.01705430  | 3.71703180  | 0.49594860  |
| H  | 2.56376430  | 3.25984010  | 0.03355690  |
| N  | 2.52716180  | -1.54608250 | -0.02185800 |
| H  | 3.54072690  | -1.58365870 | -0.07589750 |
| N  | 0.37187790  | -2.23316600 | 0.08574450  |
| Se | -2.46508970 | -0.18919550 | -0.28652580 |

point9

|    |             |             |             |
|----|-------------|-------------|-------------|
| C  | 0.42622580  | -0.85430290 | 0.09996980  |
| C  | 1.76762080  | -0.40155730 | -0.00160210 |
| C  | 1.25403690  | 1.76397190  | 0.00220540  |
| C  | -0.60587430 | 0.13557690  | 0.21784740  |
| C  | 1.64583150  | -2.61041020 | 0.03492120  |
| H  | 1.99535320  | -3.64185690 | 0.01987100  |
| N  | -0.06690760 | 1.45602590  | 0.08968140  |
| H  | -0.73739450 | 2.21465010  | -0.00317020 |
| N  | 2.24339390  | 0.87565210  | -0.03039310 |
| N  | 1.56148940  | 3.11340990  | -0.12785850 |
| H  | 1.02119020  | 3.71882950  | 0.48824660  |
| H  | 2.56104060  | 3.25610860  | 0.00701590  |
| N  | 2.52300020  | -1.54362870 | -0.03159950 |
| H  | 3.53521070  | -1.58178040 | -0.10705350 |
| N  | 0.36946500  | -2.22941750 | 0.11683380  |
| Se | -2.41539580 | -0.18988980 | -0.41545540 |

point10

|    |             |             |             |
|----|-------------|-------------|-------------|
| C  | 0.42315945  | -0.84847708 | 0.13686556  |
| C  | 1.76322945  | -0.39805927 | -0.00563927 |
| C  | 1.24815516  | 1.75992091  | 0.00325648  |
| C  | -0.61292810 | 0.13307843  | 0.29989982  |
| C  | 1.63936296  | -2.60628281 | 0.03906793  |
| H  | 1.98698020  | -3.63823931 | 0.01507284  |
| N  | -0.06713274 | 1.44987637  | 0.13139633  |
| H  | -0.73840978 | 2.21047555  | 0.07049527  |
| N  | 2.23881517  | 0.87452381  | -0.05440728 |
| N  | 1.55310297  | 3.10771503  | -0.14461030 |
| H  | 1.02756896  | 3.71981784  | 0.47749219  |
| H  | 2.55567677  | 3.25147161  | -0.03636022 |
| N  | 2.51601483  | -1.54085161 | -0.05348515 |
| H  | 3.52539657  | -1.58033783 | -0.16016352 |
| N  | 0.36663852  | -2.22359366 | 0.15718298  |
| Se | -2.34734917 | -0.18965774 | -0.51660361 |

### The T1 minimum to the T2T1S0 crossing point

point1

|    |             |             |             |
|----|-------------|-------------|-------------|
| C  | 0.42315945  | -0.84847708 | 0.13686556  |
| C  | 1.76322945  | -0.39805927 | -0.00563927 |
| C  | 1.24815516  | 1.75992091  | 0.00325648  |
| C  | -0.61292810 | 0.13307843  | 0.29989982  |
| C  | 1.63936296  | -2.60628281 | 0.03906793  |
| H  | 1.98698020  | -3.63823931 | 0.01507284  |
| N  | -0.06713274 | 1.44987637  | 0.13139633  |
| H  | -0.73840978 | 2.21047555  | 0.07049527  |
| N  | 2.23881517  | 0.87452381  | -0.05440728 |
| N  | 1.55310297  | 3.10771503  | -0.14461030 |
| H  | 1.02756896  | 3.71981784  | 0.47749219  |
| H  | 2.55567677  | 3.25147161  | -0.03636022 |
| N  | 2.51601483  | -1.54085161 | -0.05348515 |
| H  | 3.52539657  | -1.58033783 | -0.16016352 |
| N  | 0.36663852  | -2.22359366 | 0.15718298  |
| Se | -2.34734917 | -0.18965774 | -0.51660361 |

point2

|    |             |             |             |
|----|-------------|-------------|-------------|
| C  | 0.40747510  | -0.88460250 | 0.13175140  |
| C  | 1.75448460  | -0.39824130 | -0.00531930 |
| C  | 1.25595620  | 1.74487400  | -0.00234590 |
| C  | -0.61065410 | 0.10986330  | 0.26826690  |
| C  | 1.67074490  | -2.60976540 | 0.04360530  |
| H  | 2.04310560  | -3.63329720 | 0.02397260  |
| N  | -0.05638280 | 1.42783390  | 0.11765110  |
| H  | -0.71846630 | 2.19949590  | 0.06360520  |
| N  | 2.23832490  | 0.86449020  | -0.05617400 |
| N  | 1.55565050  | 3.09390330  | -0.14265580 |
| H  | 1.01755900  | 3.70361710  | 0.47080130  |
| H  | 2.55594500  | 3.24501360  | -0.02460340 |
| N  | 2.52890750  | -1.52669320 | -0.04646370 |
| H  | 3.53959200  | -1.54849840 | -0.14572720 |
| N  | 0.38840790  | -2.26227940 | 0.15284020  |
| Se | -2.49236400 | -0.04433280 | -0.48974450 |

point3

|   |             |             |             |
|---|-------------|-------------|-------------|
| C | 0.39522120  | -0.91818550 | 0.12407840  |
| C | 1.74755430  | -0.39976720 | -0.00546100 |
| C | 1.26195370  | 1.73007830  | -0.00780340 |
| C | -0.60822150 | 0.08557850  | 0.23390920  |
| C | 1.69999200  | -2.61326710 | 0.04729790  |
| H | 2.09443030  | -3.62872850 | 0.03250330  |

|    |             |             |             |
|----|-------------|-------------|-------------|
| N  | -0.04762590 | 1.40531890  | 0.10143610  |
| H  | -0.70088950 | 2.18755570  | 0.05330310  |
| N  | 2.23766360  | 0.85459410  | -0.05680390 |
| N  | 1.55591340  | 3.08042940  | -0.14008160 |
| H  | 1.00413910  | 3.68742760  | 0.46363760  |
| H  | 2.55349360  | 3.23928860  | -0.01055110 |
| N  | 2.54144430  | -1.51463020 | -0.03946490 |
| H  | 3.55314710  | -1.52031480 | -0.13033320 |
| N  | 0.40994270  | -2.29754000 | 0.14626010  |
| Se | -2.61987240 | 0.10354330  | -0.45246650 |

point4

|    |             |             |             |
|----|-------------|-------------|-------------|
| C  | 0.38781260  | -0.94715400 | 0.11369730  |
| C  | 1.74388750  | -0.40257990 | -0.00590670 |
| C  | 1.26614280  | 1.71633050  | -0.01284480 |
| C  | -0.60530970 | 0.06158610  | 0.19777790  |
| C  | 1.72628870  | -2.61692030 | 0.04995160  |
| H  | 2.13896310  | -3.62532360 | 0.04036300  |
| N  | -0.04101530 | 1.38306460  | 0.08335120  |
| H  | -0.68722840 | 2.17410560  | 0.04007720  |
| N  | 2.23746960  | 0.84552490  | -0.05591730 |
| N  | 1.55398530  | 3.06801480  | -0.13704250 |
| H  | 0.98759100  | 3.67217930  | 0.45567700  |
| H  | 2.54838290  | 3.23493860  | 0.00547570  |
| N  | 2.55402200  | -1.50556480 | -0.03236730 |
| H  | 3.56652870  | -1.49771840 | -0.11373570 |
| N  | 0.43063180  | -2.32765730 | 0.13720260  |
| Se | -2.72986640 | 0.24855490  | -0.40629900 |

point5

|   |             |             |             |
|---|-------------|-------------|-------------|
| C | 0.38689300  | -0.96909590 | 0.10064600  |
| C | 1.74520240  | -0.40660020 | -0.00640200 |
| C | 1.26862960  | 1.70451620  | -0.01718940 |
| C | -0.60143190 | 0.03962870  | 0.16088860  |
| C | 1.74878160  | -2.62090850 | 0.05133410  |
| H | 2.17452390  | -3.62405450 | 0.04710870  |
| N | -0.03672810 | 1.36197180  | 0.06402070  |
| H | -0.67948350 | 2.15848730  | 0.02434930  |
| N | 2.23855470  | 0.83803010  | -0.05306810 |
| N | 1.55022870  | 3.05744630  | -0.13370600 |
| H | 0.96852950  | 3.65893670  | 0.44657350  |
| H | 2.54096160  | 3.23257710  | 0.02313850  |
| N | 2.56718490  | -1.50054000 | -0.02505880 |
| H | 3.58038030  | -1.48293110 | -0.09575190 |



|    |             |             |             |
|----|-------------|-------------|-------------|
| N  | 0.44980760  | -2.35069860 | 0.12550770  |
| Se | -2.82374840 | 0.38461580  | -0.35293080 |

point6

|    |             |             |             |
|----|-------------|-------------|-------------|
| C  | 0.39408760  | -0.98165490 | 0.08519470  |
| C  | 1.75320810  | -0.41169950 | -0.00661160 |
| C  | 1.26966980  | 1.69546580  | -0.02061310 |
| C  | -0.59596940 | 0.02149980  | 0.12421250  |
| C  | 1.76667810  | -2.62539130 | 0.05123490  |
| H  | 2.19904740  | -3.62586070 | 0.05224080  |
| N  | -0.03481920 | 1.34289820  | 0.04402700  |
| H  | -0.67962810 | 2.13993290  | 0.00645610  |
| N  | 2.24179800  | 0.83279710  | -0.04785650 |
| N  | 1.54519020  | 3.04946730  | -0.13025210 |
| H  | 0.94778070  | 3.64870960  | 0.43601210  |
| H  | 2.53177740  | 3.23276550  | 0.04205860  |
| N  | 2.58150320  | -1.50055080 | -0.01742870 |
| H  | 3.59537070  | -1.47811800 | -0.07626910 |
| N  | 0.46683670  | -2.36479740 | 0.11115370  |
| Se | -2.90424530 | 0.50591770  | -0.29409920 |

point7

|    |             |             |             |
|----|-------------|-------------|-------------|
| C  | 0.41070850  | -0.98303180 | 0.06781490  |
| C  | 1.76923590  | -0.41767110 | -0.00617870 |
| C  | 1.26966310  | 1.68977110  | -0.02302350 |
| C  | -0.58823580 | 0.00859670  | 0.08853190  |
| C  | 1.77933010  | -2.63037720 | 0.04954020  |
| H  | 2.21090330  | -3.63132740 | 0.05534510  |
| N  | -0.03510020 | 1.32640430  | 0.02385830  |
| H  | -0.68897320 | 2.11757220  | -0.01330510 |
| N  | 2.24797160  | 0.83031610  | -0.04010090 |
| N  | 1.53941810  | 3.04463410  | -0.12685860 |
| H  | 0.92615210  | 3.64219230  | 0.42380360  |
| H  | 2.52138580  | 3.23598180  | 0.06179500  |
| N  | 2.59737960  | -1.50629300 | -0.00936740 |
| H  | 3.61194930  | -1.48494080 | -0.05525190 |
| N  | 0.48123290  | -2.36846430 | 0.09428890  |
| Se | -2.97473520 | 0.60801820  | -0.23143160 |

point8

|   |             |             |             |
|---|-------------|-------------|-------------|
| C | 0.43761720  | -0.97224270 | 0.04908580  |
| C | 1.79401350  | -0.42423100 | -0.00478200 |
| C | 1.26911110  | 1.68769680  | -0.02448170 |
| C | -0.57750720 | 0.00165190  | 0.05436440  |

|    |             |             |             |
|----|-------------|-------------|-------------|
| C  | 1.78621580  | -2.63560020 | 0.04625660  |
| H  | 2.20896290  | -3.64043050 | 0.05617710  |
| N  | -0.03710960 | 1.31262330  | 0.00389120  |
| H  | -0.70779150 | 2.09040560  | -0.03461920 |
| N  | 2.25762380  | 0.83080750  | -0.02991950 |
| N  | 1.53331030  | 3.04324230  | -0.12368870 |
| H  | 0.90423580  | 3.63962230  | 0.40993230  |
| H  | 2.51018900  | 3.24261090  | 0.08184900  |
| N  | 2.61488040  | -1.51801980 | -0.00076820 |
| H  | 3.63012630  | -1.50431320 | -0.03272290 |
| N  | 0.49271700  | -2.36067400 | 0.07518330  |
| Se | -3.03830890 | 0.68823200  | -0.16629730 |

point9

|    |             |             |             |
|----|-------------|-------------|-------------|
| C  | 0.47535590  | -0.94892390 | 0.02960540  |
| C  | 1.82773110  | -0.43106520 | -0.00213440 |
| C  | 1.26858580  | 1.68926650  | -0.02515350 |
| C  | -0.56295360 | 0.00086260  | 0.02200870  |
| C  | 1.78678150  | -2.64044990 | 0.04145360  |
| H  | 2.19227970  | -3.65247910 | 0.05460670  |
| N  | -0.04017100 | 1.30135310  | -0.01560940 |
| H  | -0.73546990 | 2.05719410  | -0.05716090 |
| N  | 2.27111400  | 0.83425460  | -0.01762040 |
| N  | 1.52712210  | 3.04539210  | -0.12090310 |
| H  | 0.88239290  | 3.64088810  | 0.39447960  |
| H  | 2.49844040  | 3.25298080  | 0.10170500  |
| N  | 2.63366780  | -1.53561190 | 0.00848460  |
| H  | 3.64937310  | -1.53655440 | -0.00870310 |
| N  | 0.50117990  | -2.34059420 | 0.05410620  |
| Se | -3.09714360 | 0.74486790  | -0.09970490 |

point10

|   |             |             |             |
|---|-------------|-------------|-------------|
| C | 0.52516396  | -0.90114467 | 0.18157102  |
| C | 1.85157484  | -0.45142869 | -0.09141164 |
| C | 1.26514631  | 1.68456982  | -0.16078999 |
| C | -0.52510938 | 0.03267055  | 0.28523922  |
| C | 1.75634970  | -2.64840156 | 0.10837270  |
| H | 2.12683012  | -3.67381114 | 0.12814331  |
| N | -0.03086527 | 1.30507438  | 0.08472531  |
| H | -0.75209641 | 2.03608751  | 0.11554632  |
| N | 2.26914670  | 0.81659619  | -0.25708657 |
| N | 1.50449023  | 3.02747481  | -0.38957012 |
| H | 0.94358865  | 3.66512293  | 0.17119714  |
| H | 2.49781146  | 3.24280971  | -0.33598929 |

|    |             |             |             |
|----|-------------|-------------|-------------|
| N  | 2.61901338  | -1.58215175 | -0.13346502 |
| H  | 3.61874526  | -1.62288744 | -0.30910646 |
| N  | 0.50333713  | -2.29033365 | 0.30146882  |
| Se | -3.09480912 | 0.84103484  | 0.66067446  |

**The T1 minimum to S0T1 crossing point**

point1

|    |             |             |             |
|----|-------------|-------------|-------------|
| C  | 0.42315945  | -0.84847708 | 0.13686556  |
| C  | 1.76322945  | -0.39805927 | -0.00563927 |
| C  | 1.24815516  | 1.75992091  | 0.00325648  |
| C  | -0.61292810 | 0.13307843  | 0.29989982  |
| C  | 1.63936296  | -2.60628281 | 0.03906793  |
| H  | 1.98698020  | -3.63823931 | 0.01507284  |
| N  | -0.06713274 | 1.44987637  | 0.13139633  |
| H  | -0.73840978 | 2.21047555  | 0.07049527  |
| N  | 2.23881517  | 0.87452381  | -0.05440728 |
| N  | 1.55310297  | 3.10771503  | -0.14461030 |
| H  | 1.02756896  | 3.71981784  | 0.47749219  |
| H  | 2.55567677  | 3.25147161  | -0.03636022 |
| N  | 2.51601483  | -1.54085161 | -0.05348515 |
| H  | 3.52539657  | -1.58033783 | -0.16016352 |
| N  | 0.36663852  | -2.22359366 | 0.15718298  |
| Se | -2.34734917 | -0.18965774 | -0.51660361 |

point2

|    |             |             |             |
|----|-------------|-------------|-------------|
| C  | 0.41909590  | -0.85306400 | 0.14403070  |
| C  | 1.75818430  | -0.40085690 | -0.01498460 |
| C  | 1.25168570  | 1.75960620  | 0.00973750  |
| C  | -0.61379350 | 0.13382420  | 0.31229060  |
| C  | 1.63261920  | -2.61111940 | 0.04600530  |
| H  | 1.98135090  | -3.64291020 | 0.02571370  |
| N  | -0.05906970 | 1.45113880  | 0.15995400  |
| H  | -0.72826200 | 2.21583080  | 0.13537320  |
| N  | 2.23755270  | 0.86920830  | -0.07216020 |
| N  | 1.56115950  | 3.10708080  | -0.11507510 |
| H  | 0.98943110  | 3.74798090  | 0.43211700  |
| H  | 2.56287000  | 3.27785220  | -0.05118700 |
| N  | 2.50791600  | -1.54855980 | -0.06450590 |
| H  | 3.51633490  | -1.59191190 | -0.17881340 |
| N  | 0.36207450  | -2.23178370 | 0.17451670  |
| Se | -2.30086340 | -0.20093510 | -0.58355250 |

point3

|   |            |             |            |
|---|------------|-------------|------------|
| C | 0.41474970 | -0.85669910 | 0.15212120 |
|---|------------|-------------|------------|

|    |             |             |             |
|----|-------------|-------------|-------------|
| C  | 1.75278000  | -0.40312730 | -0.02386940 |
| C  | 1.25364660  | 1.75935150  | 0.01719310  |
| C  | -0.61599800 | 0.13462280  | 0.32494360  |
| C  | 1.62620800  | -2.61488590 | 0.05270360  |
| H  | 1.97600720  | -3.64650300 | 0.03557360  |
| N  | -0.05264430 | 1.45229270  | 0.18897160  |
| H  | -0.71859140 | 2.22032320  | 0.20043810  |
| N  | 2.23482660  | 0.86470120  | -0.08914990 |
| N  | 1.56851060  | 3.10590010  | -0.08452130 |
| H  | 0.95656810  | 3.77147910  | 0.38319070  |
| H  | 2.56765580  | 3.29864950  | -0.06568040 |
| N  | 2.50000730  | -1.55457330 | -0.07551440 |
| H  | 3.50740210  | -1.60095570 | -0.19766890 |
| N  | 0.35795940  | -2.23826110 | 0.19229560  |
| Se | -2.25080160 | -0.21093340 | -0.65156650 |

point4

|    |             |             |             |
|----|-------------|-------------|-------------|
| C  | 0.41010380  | -0.85935460 | 0.16105880  |
| C  | 1.74699360  | -0.40486060 | -0.03235160 |
| C  | 1.25392810  | 1.75915430  | 0.02564900  |
| C  | -0.61966750 | 0.13545200  | 0.33776490  |
| C  | 1.62013670  | -2.61755270 | 0.05917940  |
| H  | 1.97095730  | -3.64899440 | 0.04472450  |
| N  | -0.04799610 | 1.45332950  | 0.21850670  |
| H  | -0.70957450 | 2.22394730  | 0.26574740  |
| N  | 2.23056430  | 0.86104260  | -0.10541410 |
| N  | 1.57507060  | 3.10415530  | -0.05284940 |
| H  | 0.92918760  | 3.79036560  | 0.33101550  |
| H  | 2.57020810  | 3.31363240  | -0.08022520 |
| N  | 2.49229110  | -1.55885670 | -0.08656360 |
| H  | 3.49860390  | -1.60741030 | -0.21678400 |
| N  | 0.35429930  | -2.24300150 | 0.21052490  |
| Se | -2.19682040 | -0.21966690 | -0.72052300 |

point5

|   |             |             |             |
|---|-------------|-------------|-------------|
| C | 0.40515040  | -0.86099350 | 0.17075630  |
| C | 1.74081220  | -0.40603080 | -0.04046810 |
| C | 1.25244000  | 1.75902020  | 0.03518640  |
| C | -0.62491730 | 0.13629560  | 0.35065810  |
| C | 1.61440680  | -2.61908140 | 0.06542240  |
| H | 1.96619720  | -3.65035210 | 0.05319530  |
| N | -0.04523880 | 1.45423630  | 0.24864660  |
| H | -0.70136410 | 2.22668350  | 0.33139900  |
| N | 2.22471010  | 0.85828570  | -0.12093570 |

|    |             |             |             |
|----|-------------|-------------|-------------|
| N  | 1.58078030  | 3.10182790  | -0.01987520 |
| H  | 0.90747390  | 3.80456850  | 0.27575040  |
| H  | 2.57055800  | 3.32253020  | -0.09530690 |
| N  | 2.48476770  | -1.56136700 | -0.09769650 |
| H  | 3.48994360  | -1.61121610 | -0.23618750 |
| N  | 0.35109850  | -2.24596110 | 0.22917930  |
| Se | -2.13853250 | -0.22706470 | -0.79026380 |

point6

|    |             |             |             |
|----|-------------|-------------|-------------|
| C  | 0.39989120  | -0.86156040 | 0.18111280  |
| C  | 1.73423650  | -0.40658300 | -0.04822820 |
| C  | 1.24911340  | 1.75897180  | 0.04596050  |
| C  | -0.63185330 | 0.13715080  | 0.36352180  |
| C  | 1.60901430  | -2.61941630 | 0.07138860  |
| H  | 1.96171160  | -3.65052770 | 0.06096180  |
| N  | -0.04446350 | 1.45500210  | 0.27951870  |
| H  | -0.69409470 | 2.22850090  | 0.39754460  |
| N  | 2.21722960  | 0.85650910  | -0.13562660 |
| N  | 1.58560610  | 3.09890550  | 0.01469880  |
| H  | 0.89164030  | 3.81381440  | 0.21737060  |
| H  | 2.56853330  | 3.32497580  | -0.11154200 |
| N  | 2.47743890  | -1.56204170 | -0.10894290 |
| H  | 3.48142650  | -1.61230000 | -0.25587570 |
| N  | 0.34835870  | -2.24706990 | 0.24819210  |
| Se | -2.07550280 | -0.23295000 | -0.86059470 |

point7

|    |             |             |             |
|----|-------------|-------------|-------------|
| C  | 0.39433970  | -0.86096810 | 0.19200880  |
| C  | 1.72728640  | -0.40641580 | -0.05560380 |
| C  | 1.24390390  | 1.75906150  | 0.05822920  |
| C  | -0.64057110 | 0.13803910  | 0.37624550  |
| C  | 1.60395100  | -2.61847080 | 0.07698980  |
| H  | 1.95747340  | -3.64944310 | 0.06792960  |
| N  | -0.04574010 | 1.45562580  | 0.31130680  |
| H  | -0.68788730 | 2.22935910  | 0.46441120  |
| N  | 2.20811630  | 0.85583600  | -0.14930090 |
| N  | 1.58953970  | 3.09539050  | 0.05132920  |
| H  | 0.88200050  | 3.81750710  | 0.15560910  |
| H  | 2.56365460  | 3.32042180  | -0.12973160 |
| N  | 2.47031300  | -1.56078100 | -0.12031470 |
| H  | 3.47306720  | -1.61055630 | -0.27579960 |
| N  | 0.34607860  | -2.24621780 | 0.26743880  |
| Se | -2.00723990 | -0.23700680 | -0.93128720 |

## point8

|    |             |             |             |
|----|-------------|-------------|-------------|
| C  | 0.38852470  | -0.85907280 | 0.20329820  |
| C  | 1.72001160  | -0.40535150 | -0.06251070 |
| C  | 1.23679950  | 1.75939360  | 0.07240440  |
| C  | -0.65115400 | 0.13902860  | 0.38870380  |
| C  | 1.59920540  | -2.61610270 | 0.08207440  |
| H  | 1.95344190  | -3.64696800 | 0.07390260  |
| N  | -0.04911680 | 1.45613280  | 0.34428040  |
| H  | -0.68285390 | 2.22921540  | 0.53233750  |
| N  | 2.19740580  | 0.85646560  | -0.16162830 |
| N  | 1.59260300  | 3.09131740  | 0.09071240  |
| H  | 0.87908440  | 3.81451060  | 0.08985890  |
| H  | 2.55494320  | 3.30799970  | -0.15095610 |
| N  | 2.46341340  | -1.55741890 | -0.13179630 |
| H  | 3.46490150  | -1.60581640 | -0.29584280 |
| N  | 0.34425220  | -2.24323270 | 0.28670730  |
| Se | -1.93317590 | -0.23871940 | -1.00208560 |

## point9

|    |             |             |             |
|----|-------------|-------------|-------------|
| C  | 0.38249830  | -0.85562640 | 0.21479500  |
| C  | 1.71251130  | -0.40307970 | -0.06877360 |
| C  | 1.22783900  | 1.76016820  | 0.08914960  |
| C  | -0.66366650 | 0.14027820  | 0.40074870  |
| C  | 1.59476470  | -2.61206790 | 0.08638810  |
| H  | 1.94955970  | -3.64287420 | 0.07851940  |
| N  | -0.05461400 | 1.45660910  | 0.37885020  |
| H  | -0.67909920 | 2.22804290  | 0.60184390  |
| N  | 2.18520320  | 0.85873100  | -0.17204370 |
| N  | 1.59486240  | 3.08678440  | 0.13393870  |
| H  | 0.88385860  | 3.80271580  | 0.01898780  |
| H  | 2.54052030  | 3.28625120  | -0.17675370 |
| N  | 2.45679570  | -1.55166850 | -0.14332680 |
| H  | 3.45700950  | -1.59779210 | -0.31577940 |
| N  | 0.34286530  | -2.23783640 | 0.30564160  |
| Se | -1.85262220 | -0.23725440 | -1.07272570 |

## point10

|   |             |             |             |
|---|-------------|-------------|-------------|
| C | 0.37669696  | -0.85003083 | 0.22811035  |
| C | 1.70482149  | -0.39909719 | -0.07468723 |
| C | 1.21729542  | 1.76184033  | 0.10829590  |
| C | -0.67748731 | 0.14240235  | 0.41513149  |
| C | 1.59074295  | -2.60586328 | 0.09052875  |
| H | 1.94585773  | -3.63668668 | 0.08226068  |
| N | -0.06155549 | 1.45754608  | 0.41671739  |

|    |             |             |             |
|----|-------------|-------------|-------------|
| H  | -0.67564311 | 2.22631769  | 0.67530528  |
| N  | 2.17140629  | 0.86309318  | -0.18181761 |
| N  | 1.59672408  | 3.08213880  | 0.18000795  |
| H  | 0.89807619  | 3.77798371  | -0.06117336 |
| H  | 2.51626349  | 3.25237161  | -0.21392824 |
| N  | 2.45029660  | -1.54311377 | -0.15586400 |
| H  | 3.44897642  | -1.58618374 | -0.33791034 |
| N  | 0.34240089  | -2.22934048 | 0.32647233  |
| Se | -1.76658647 | -0.23199658 | -1.13798925 |
